# Supplementary material for: Hydrogen peroxide-triggered gene silencing in mammalian cells through boronated antisense oligonucleotides
Source: PubMed Central journal article supplement (PMC5875086; doi:10.1039/c7sc04318j), 2017-12-06
Supplement: SC-009-C7SC04318J-s001.pdf [file SC-009-C7SC04318J-s001.pdf]

## Supplementary Information

# Hydrogen peroxide-triggered gene silencing in mammalian cells through boronated antisense oligonucleotides

Shohei Mori,<sup>a</sup> Kunihiko Morihiro,<sup>\*a,b†</sup> Takumi Okuda,<sup>a</sup> Yuuya Kasahara,<sup>a,b</sup> and Satoshi Obika<sup>\*a,b</sup>

<sup>a</sup> Graduate School of Pharmaceutical Sciences, Osaka University, 1-6 Yamadaoka, Suita, Osaka 565-0871, Japan

<sup>b</sup> National Institutes of Biomedical Innovation, Health and Nutrition (NIBIOHN), 7-6-8 Saito-Asagi, Ibaraki, Osaka 567-0085, Japan

<sup>\*</sup> Corresponding authors. E-mails: morihiro@bioorg.rcast.u-tokyo.ac.jp (K.M.); obika@phs.osaka-u.ac.jp (S.O.)

<sup>†</sup> Present address: Department of Chemistry and Biotechnology, Graduate School of Engineering, The University of Tokyo

## Contents

|                                                                                                                      |     |
|----------------------------------------------------------------------------------------------------------------------|-----|
| 1. Synthesis of boronated nucleoside analogues and <b>dT<sup>B</sup></b> phosphoramidite                             | S2  |
| 2. <sup>1</sup> H-, <sup>13</sup> C- and <sup>31</sup> P-NMR spectra of new compounds                                | S10 |
| 3. H <sub>2</sub> O <sub>2</sub> -decaging of boronated nucleosides                                                  | S31 |
| 4. Peroxynitrite (ONOO <sup>-</sup> )-decaging of <b>dT<sup>B</sup>pin</b>                                           | S32 |
| 5. ESI and MALDI-TOF MS analysis of <b>dT<sup>B</sup></b> -modified ODNs                                             | S33 |
| 6. UV melting experiments of duplexes containing <b>dT<sup>B</sup></b> without or with H <sub>2</sub> O <sub>2</sub> | S43 |
| 7. Reference                                                                                                         | S44 |

## 1. Synthesis of boronated nucleoside analogues and dT<sup>B</sup> phosphoramidite

### 1-1. 4-(4,4,5,5-Tetramethyl-1,3,2-dioxaborolan-2-yl)1H-imidazole-1-carboxylate (17)

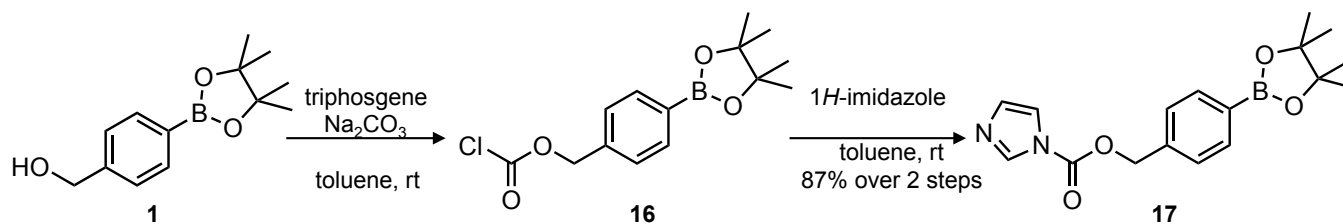

$\text{Na}_2\text{CO}_3$  (3.5 g, 33.0 mmol) was placed in a flame dried round-bottom flask and triphosgene (2.2 g, 7.4 mmol) in toluene (15 mL) was added at 0 °C. After stirring for 1 h at 0 °C, benzyl alcohol **1** (0.87 g, 3.7 mmol) in toluene (5 mL) was added and stirred for 6 h at room temperature. The insoluble residues were filtered off through a Celite pad. After the solvent was removed in vacuo, the resulting chloroformate **16**<sup>S1</sup> was used without further purification. Chloroformate **16** (1.09 g, 3.70 mmol) was dissolved in dry toluene (20 mL) and 1H-imidazole (1.00 g, 14.8 mmol) was added at room temperature. The reaction mixture was stirred for 4 h at room temperature and partitioned between AcOEt and  $\text{H}_2\text{O}$ . The separated organic layer was washed with brine, dried over  $\text{Na}_2\text{SO}_4$  and concentrated in vacuo. The residue was purified by a silica gel column chromatography, eluted with hexane/AcOEt (2:1) to give compound **17** (1.06 g, 87% over two steps) as a white foam. IR (KBr):  $\nu$  3130 (Ar C-H), 1762 (C=O), 1615 (C=N)  $\text{cm}^{-1}$ ;  $^1\text{H-NMR}$  (300 MHz,  $\text{CDCl}_3$ ):  $\delta$  8.15 (1H, s), 7.87 (2H, d,  $J$  = 6.0 Hz), 7.48-7.41 (3H, m), 7.05 (1H, s), 5.04 (2H, s), 1.34 (12H, s);  $^{13}\text{C-NMR}$  (100 MHz,  $\text{CDCl}_3$ ):  $\delta$  148.2, 136.8, 136.5, 134.9, 130.4, 127.4, 116.8, 83.6, 69.3, 24.6; FAB-LRMS  $m/z$  = 329 ( $\text{MH}^+$ ); FAB-HRMS calcd for  $\text{C}_{17}\text{H}_{22}\text{N}_2\text{O}_4\text{B}$  = 329.1676, found 329.1668.

### 1-2. 3-Ethyl-1-(((4-(4,4,5,5-Tetramethyl-1,3,2-dioxaborolan-2-yl)benzyl)oxy)carbonyl)-1H-imidazol-3-ium tetrafluoroborate (2)

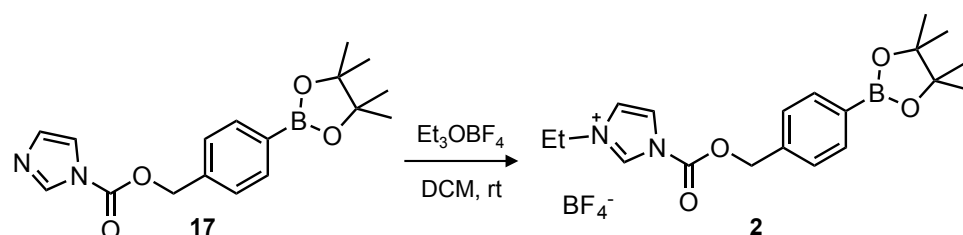

Compound **17** (1.21 g, 3.70 mmol) was dissolved in dry DCM (40 mL) and  $\text{Et}_3\text{OBF}_4$  (669 mg, 3.52 mmol) was added at room temperature. The reaction mixture was stirred for 16 h at room temperature and the resulting imidazolium salt **2** was used without further purification.

**1-3. (4-(4,4,5,5-Tetramethyl-1,3,2-dioxaborolan-2-yl)benzyl) -3,5-O-(1,1,3,3-tetraisopropylidisiloxane-1,3,diyl)-2'-deoxy thymidine (18)**

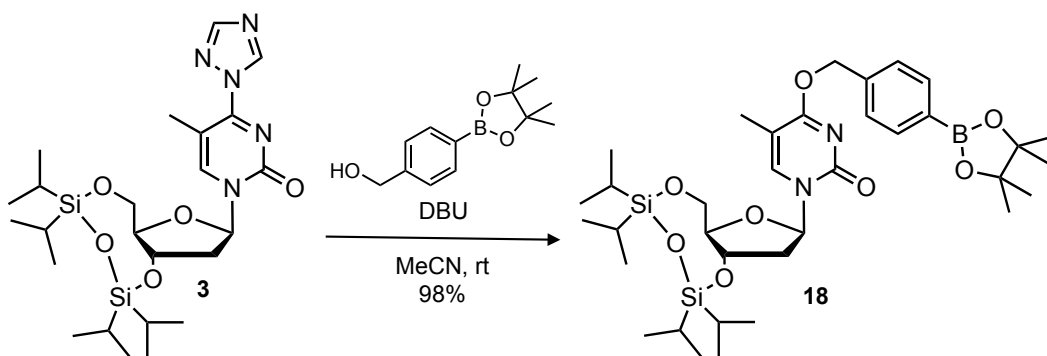

Compound **3** (160 mg, 0.297 mmol) was dissolved in dry MeCN (5 mL) and 2-(4-hydroxymethylphenyl)-4,4,5,5-tetramethyl-1,3,2-dioxaborolane (139 mg, 0.594 mmol) and DBU (89  $\mu$ L, 0.594 mmol) were added at room temperature. The reaction mixture was stirred for 4 h at room temperature and the solvent was removed in vacuo. The residue was purified by a silica gel column chromatography, eluted with hexane/AcOEt (7:3) to give compound **18** (204 mg, 98%) as a white foam. IR (KBr):  $\nu$  2943 (Ar C-H), 1670 (C=O), 1532 (C=N)  $\text{cm}^{-1}$ ;  $[\alpha]_{\text{D}}^{24}$  25.0 (c 1.00,  $\text{CHCl}_3$ );  $^1\text{H-NMR}$  (300 MHz,  $\text{CDCl}_3$ ):  $\delta$  7.86-7.75 (3H, m), 7.39 (2H, dd,  $J = 12.0, 7.5$  Hz), 6.05 (H, d,  $J = 6.5$  Hz), 5.43 (2H, dd,  $J = 13.0, 16.0$  Hz), 4.46-4.38 (1H, m), 4.19 (1H, d,  $J = 13.0$  Hz), 4.03-4.00 (1H, m), 3.80-3.78 (1H, m), 2.62-2.52 (1H, m), 2.38-2.31 (1H, m), 1.99 (3H, s), 1.34 (12H, s), 1.14-0.95 (28H, m);  $^{13}\text{C-NMR}$  (75 MHz,  $\text{CDCl}_3$ ):  $\delta$  169.9, 155.4, 144.5, 139.4, 138.7, 134.7, 134.6, 126.9, 125.7, 103.8, 84.9, 84.8, 83.5, 83.4, 83.5, 83.4, 77.2, 68.3, 66.3, 64.4, 59.5, 39.6, 24.6, 17.2, 17.1, 17.0, 16.8, 16.7, 16.6, 13.2, 12.7, 12.4, 12.2, 12.1; MS (FAB)  $m/z$  723  $[\text{M}+\text{Na}]^+$ ; HRMS (FAB): Calcd for  $\text{C}_{35}\text{H}_{57}\text{N}_2\text{O}_8\text{BSi}_2\text{Na}$   $[\text{M}+\text{Na}]^+$ : 723.3644. Found: 723.33651.

**1-4. (4-(4,4,5,5-Tetramethyl-1,3,2-dioxaborolan-2-yl)benzyl)-2'-deoxy thymidine (4)**

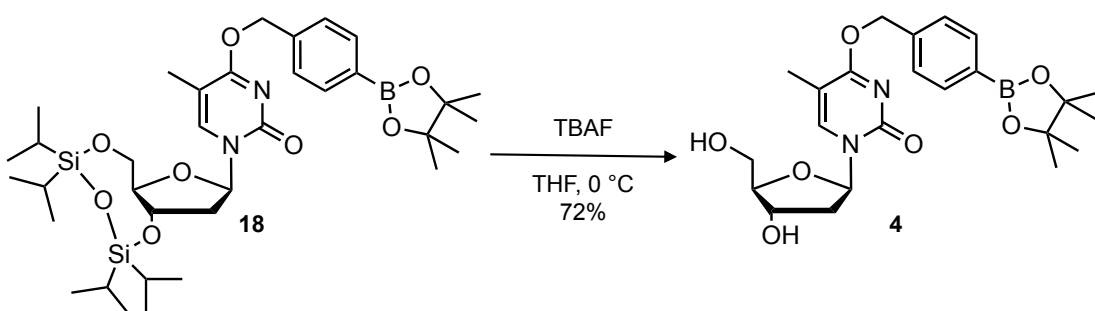

To a solution of **18** (160 mg, 0.227 mmol) in dry THF (2.5 mL) was added 1 M TBAF solution in THF (478  $\mu$ L, 0.478 mmol) was added dropwise at 0  $^{\circ}\text{C}$ , and the reaction mixture was stirred for 10 min. and then concentrated in vacuo.

The residue was purified by a silica gel column chromatography, eluted with AcOEt/MeOH (97:3) to give **4** (78 mg, 72%) as a white foam. IR (KBr):  $\nu$  3335 (-OH), 2977 (Ar C-H), 1752 (C=O), 1660 (C=N)  $\text{cm}^{-1}$ ;  $[\alpha]_{\text{D}}^{24}$  33.5 (c 1.00, MeOH);  $^1\text{H-NMR}$  (300 MHz,  $\text{CD}_3\text{OD}$ ):  $\delta$  8.08 (1H, s), 7.64 (2H, d,  $J = 8.0$  Hz), 7.32 (2H, d,  $J = 8.0$  Hz), 6.14 (1H, dd,  $J = 6.0, 6.5$  Hz), 5.31 (2H, s), 4.30-4.26 (1H, m), 3.88-3.84 (1H, m), 3.74 (1H, dd,  $J = 3.0, 12.0$  Hz), 3.64 (1H, dd,  $J = 3.0, 12.0$  Hz), 2.95-2.90 (1H, m), 2.34-2.28 (1H, m), 2.10-2.03 (1H, m), 1.89 (3H, s), 1.22 (12H, s);  $^{13}\text{C-NMR}$  (75 MHz,  $\text{CD}_3\text{OD}$ ):  $\delta$  171.7, 158.0, 142.4, 140.4, 135.9, 128.1, 106.5, 89.1, 87.9, 85.1, 79.5, 71.6, 69.6, 62.4, 54.0, 42.2, 27.1, 25.2, 21.0, 14.0, 12.3; MS (FAB)  $m/z$  481  $[\text{M}+\text{Na}]^+$ ; HRMS (FAB): Calcd for  $\text{C}_{23}\text{H}_{31}\text{N}_2\text{O}_7\text{BNa}$   $[\text{M}+\text{Na}]^+$ : 481.2122. Found: 481.2126.

**1-5. (6-(4,4,5,5-Tetramethyl-1,3,2-dioxaborolan-2-yl)benzyl)oxycarbonyl-2'-deoxy guanosine (6)**

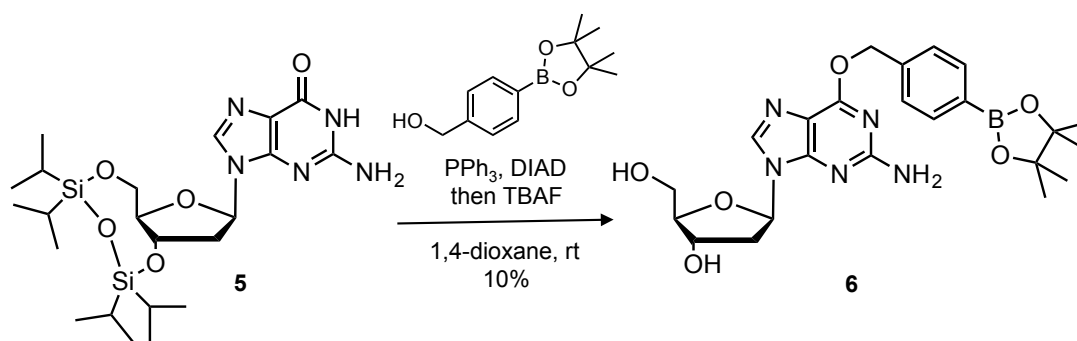

Compound **5** (300 mg, 0.585 mmol) was dissolved in dry 1,4-dioxane (6 mL) and  $\text{Ph}_3\text{P}$  (184 mg, 0.702 mmol), DIAD (138  $\mu\text{L}$ , 0.702 mmol) and 2-(4-hydroxymethylphenyl)-4,4,5,5-tetramethyl-1,3,2-dioxaborolane (144 mg, 0.614 mmol) were added at room temperature. The reaction mixture was stirred for 4 h at room temperature and cooled in an ice bath. TBAF solution in THF (1 M, 1.23 mL, 1.23 mmol) was added dropwise at 0  $^\circ\text{C}$  and the resulting mixture was stirred for 10 min. The solvent was removed in vacuo and the residue was purified by a silica gel column chromatography, eluted with AcOEt/MeOH (19:1) to give compound **6** (28 mg, 10%) as a white foam. IR (KBr):  $\nu$  3329 (-OH), 1585 (C=N)  $\text{cm}^{-1}$ ;  $[\alpha]_{\text{D}}^{24}$  -3.6 (c 1.00, MeOH);  $^1\text{H-NMR}$  (300 MHz,  $\text{CD}_3\text{OD}$ ):  $\delta$  8.03 (H, s), 7.91 (2H, s), 7.60 (2H, d,  $J = 8.0$  Hz), 7.40 (2H, d,  $J = 8.0$  Hz), 6.30 (1H, dd,  $J = 6.5, 9.0$  Hz), 5.50 (2H, s), 4.58-4.51 (1H, m), 4.06-4.00 (1H, m), 3.86-3.67 (2H, m), 2.85-2.70 (1H, m), 2.38-2.27 (1H, m), 1.27-1.20 (12H, m);  $^{13}\text{C-NMR}$  (75 MHz,  $\text{CD}_3\text{OD}$ ):  $\delta$  180.1, 162.2, 161.4, 154.2, 140.0, 134.6, 128.3, 115.9, 89.7, 86.8, 79.5, 73.1, 69.4, 63.7, 47.4, 41.2, 24.1, 9.4, 9.3; MS (FAB)  $m/z$  506  $[\text{M}+\text{Na}]^+$ ; HRMS (FAB): Calcd for  $\text{C}_{23}\text{H}_{30}\text{N}_5\text{O}_6\text{BNa}$   $[\text{M}+\text{Na}]^+$ : 506.3219. Found: 506.3224.

**1-6. (6-(4,4,5,5-Tetramethyl-1,3,2-dioxaborolan-2-yl)benzyl)oxycarbonyl-3,5-O-(1,1,3,3-tetraisopropylidisiloxane-1,3-diyl)-2'-deoxy adenosine (19)**

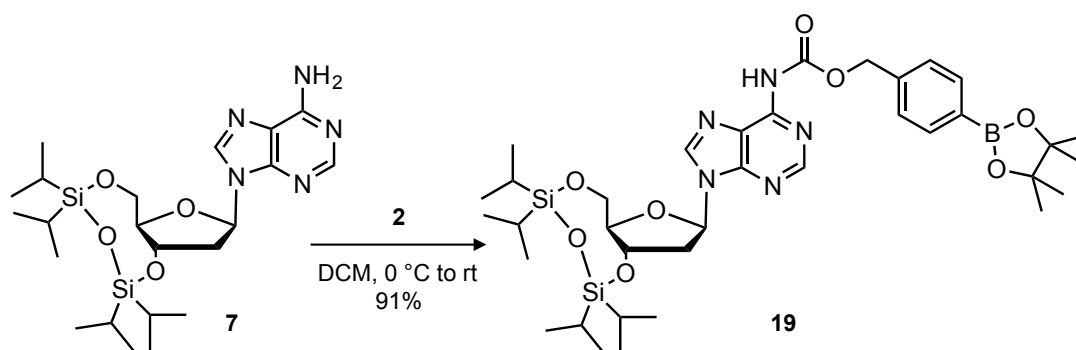

Compound **7** (124 mg, 0.25 mmol) was dissolved in dry DCM (10 mL) and compound **2** (444 mg, 1.00 mmol) in DCM (10 mL) was added at 0 °C. The reaction mixture was stirred for 24 h at room temperature and quenched by addition of saturated aqueous NaHCO<sub>3</sub>. The resulting mixture was partitioned between DCM and H<sub>2</sub>O. The separated organic layer was washed with brine, dried over Na<sub>2</sub>SO<sub>4</sub> and concentrated in vacuo. The residue was purified by a silica gel column chromatography, eluted with hexane/AcOEt (4:1) to give compound **19** (172 mg, 91%) as a white foam. IR (KBr):  $\nu$ 1758 (C=O), 1615 (C=N) cm<sup>-1</sup>; [ $\alpha$ ]<sub>D</sub><sup>24</sup> -23.4 (c 1.00, CHCl<sub>3</sub>); <sup>1</sup>H-NMR (300 MHz, CDCl<sub>3</sub>):  $\delta$  10.24 (1H, s), 8.74 (1H, s), 8.04 (1H, s), 7.81 (2H, d, *J* = 8.0 Hz), 7.39 (2H, d, *J* = 8.0 Hz), 6.00 (1H, d, *J* = 6.5 Hz), 5.36-5.23 (2H, m), 5.16-5.08 (1H, m), 4.03-3.98 (2H, m), 3.92-3.84 (1H, m), 2.81-2.56 (2H, m), 1.36 (12H, s), 1.13-1.02 (28H, m); <sup>13</sup>C-NMR (75 MHz, CDCl<sub>3</sub>):  $\delta$  152.3, 151.1, 149.9, 149.5, 144.1, 141.9, 138.1, 134.8, 134.6, 127.6, 125.7, 122.4, 84.9, 83.6, 83.4, 83.3, 77.2, 70.0, 67.2, 64.4, 61.7, 39.4, 24.6(2), 24.5(9), 17.3, 17.0(9), 17.0(7), 17.0(6), 16.9, 16.8, 16.7, 16.6, 13.0, 12.8, 12.5, 12.2; MS (FAB) *m/z* 754 [M+H]<sup>+</sup>; HRMS (FAB): Calcd for C<sub>36</sub>H<sub>57</sub>N<sub>5</sub>O<sub>8</sub>BSi<sub>2</sub> [M+H]<sup>+</sup>: 754.3839. Found: 754.3846.

**1-7. (6-(4,4,5,5-Tetramethyl-1,3,2-dioxaborolan-2-yl)benzyl)oxycarbonyl-2'-deoxy adenosine (8)**

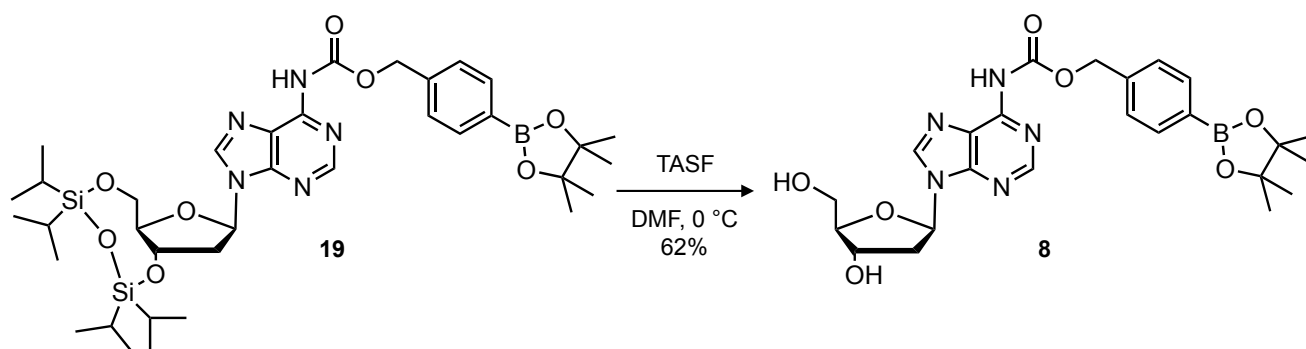

Compound **19** (1.19 g, 1.59 mmol) was dissolved in dry DMF (20 mL) and TASF (1.00 g, 3.63 mmol) was added at 0 °C. The reaction mixture was stirred for 1 h at 0 °C and partitioned between CHCl<sub>3</sub>/2-propanol (3:1) and H<sub>2</sub>O. The separated organic layer was concentrated in vacuo. The residue was purified by a silica gel column chromatography, eluted with CHCl<sub>3</sub>/MeOH (19:1) to give compound **8** (520 mg, 62%) as a white foam. IR (KBr):  $\nu$  3293 (-OH), 2977 (Ar C-H), 1757 (C=O), 1619 (C=N) cm<sup>-1</sup>;  $[\alpha]_D^{24}$  1.2 (c 1.00, DMSO); <sup>1</sup>H-NMR (300 MHz, DMSO-*d*<sub>6</sub>):  $\delta$  10.80 (1H, brs), 8.66 (1H, s), 8.63 (1H, s), 7.68 (2H, d, *J* = 8.0 Hz), 7.46 (2H, d, *J* = 8.0 Hz), 6.44 (1H, dd, *J* = 6.5, 7.0 Hz), 5.23 (2H, s), 4.47-4.39 (1H, m), 3.91-3.84 (1H, m), 3.66-3.46 (2H, m), 2.82-2.70 (1H, m), 2.39-2.25 (1H, m), 1.29 (12H, s); <sup>13</sup>C-NMR (75 MHz, DMSO-*d*<sub>6</sub>):  $\delta$  152.1, 151.6, 151.5, 149.7, 142.8, 139.8, 134.5, 126.9, 123.8, 88.0, 83.7(5), 83.7(2), 70.7, 66.0, 61.6, 48.6, 25.5, 24.7; MS (FAB) *m/z* 512 [M+H]<sup>+</sup>; HRMS (FAB): Calcd for C<sub>24</sub>H<sub>31</sub>N<sub>5</sub>O<sub>7</sub>B [M+H]<sup>+</sup>: 512.2317. Found: 512.2321.

**1-8. (4-(4,4,5,5-Tetramethyl-1,3,2-dioxaborolan-2-yl)benzyl)oxycarbonyl-3,5-O-(1,1,3,3-tetraisopropylidisiloxane-1,3-diyl)-2'-deoxy cytidine (20)**

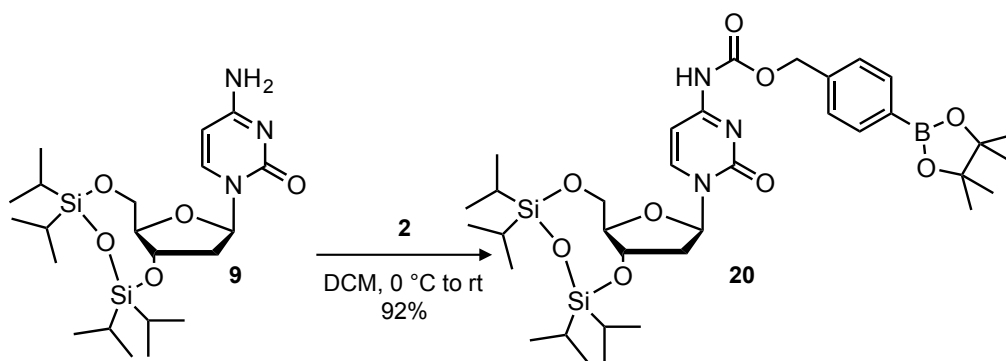

Compound **9** (416 mg, 0.88 mmol) was dissolved in dry DCM (10 mL) and compound **2** (1.56 g, 3.50 mmol) in DCM (10 mL) was added at 0 °C. The reaction mixture was stirred for 24 h at room temperature. and quenched by addition of saturated aqueous NaHCO<sub>3</sub>. The resulting mixture was partitioned between DCM and H<sub>2</sub>O. The separated organic layer was washed with brine, dried over Na<sub>2</sub>SO<sub>4</sub> and concentrated in vacuo. The residue was purified by a silica gel column chromatography, eluted with hexane/AcOEt (4:1) to give compound **20** (593 mg, 92%) as a white foam. IR (KBr):  $\nu$  3151 (Ar C-H), 1747 (C=O), 1622 (C=N) cm<sup>-1</sup>;  $[\alpha]_D^{24}$  27.7 (c 1.00, CHCl<sub>3</sub>); <sup>1</sup>H-NMR (300 MHz, CDCl<sub>3</sub>):  $\delta$  8.80 (1H, drs), 8.22 (1H, d, *J* = 7.5 Hz), 7.81 (2H, d, *J* = 8.0 Hz), 7.37 (2H, d, *J* = 8.0 Hz), 7.23 (1H, d, *J* = 7.5 Hz), 6.03 (1H, d, *J* = 7.0 Hz), 5.21 (2H, s), 4.43-4.30 (1H, m), 4.21 (1H, d, *J* = 13.0 Hz), 4.02 (1H, dd, *J* = 3.0, 13.0 Hz), 3.81 (1H, d, *J* = 8.0 Hz), 2.63-2.49 (1H, m), 2.41-2.28 (1H, m), 1.34 (12H, s), 1.13-0.92 (28H, m); <sup>13</sup>C-NMR (75 MHz, CDCl<sub>3</sub>):  $\delta$  162.4, 137.9, 135.0, 134.8, 134.7, 134.6, 126.9, 125.7, 85.3, 84.9, 83.5(4), 83.5(1), 83.4, 77.2, 67.3, 66.1, 59.5, 39.3, 24.6, 17.2, 17.1(6), 17.0(8), 17.0(1), 16.7(5), 16.6(9), 16.6(5), 16.6, 13.1, 12.7, 12.6, 12.1; FAB-LRMS *m/z* = 752

(MNa<sup>+</sup>); FAB-HRMS calcd for C<sub>35</sub>H<sub>56</sub>O<sub>9</sub>N<sub>3</sub>BSi<sub>2</sub>Na= 752.3546, found 752.3553; MS (FAB) *m/z* 752 [M+Na]<sup>+</sup>; HRMS (FAB): Calcd for C<sub>35</sub>H<sub>56</sub>N<sub>3</sub>O<sub>9</sub>BSi<sub>2</sub>Na [M+Na]<sup>+</sup>: 752.3546. Found: 752.3553.

### 1-9. (4-(4,4,5,5-Tetramethyl-1,3,2-dioxaborolan-2-yl)benzyl)oxycarbonyl-2'-deoxy cytidine (10)

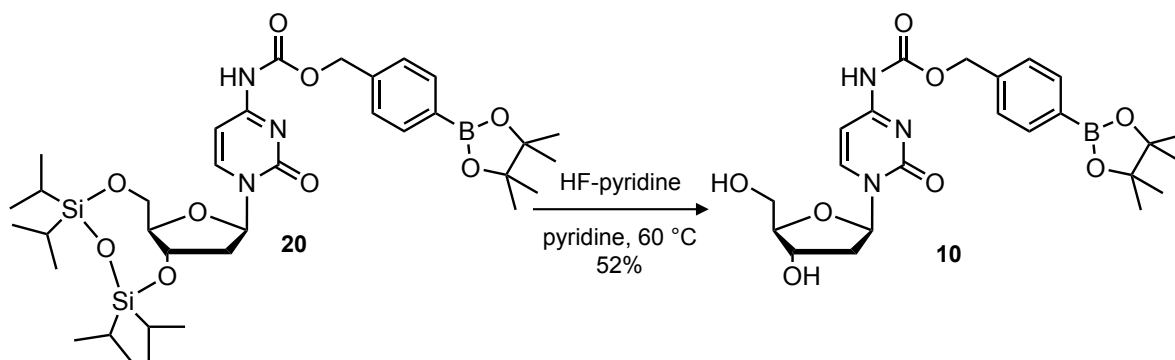

Compound **20** (1.99 g, 2.70 mmol) was dissolved in dry pyridine (20 mL) and HF-pyridine (ca 65% HF w/w, 604  $\mu$ L, 10.8 mmol) was added at room temperature. The reaction mixture was stirred for 12 h at 60 °C and cooled to room temperature. The reaction was quenched by addition of solid NaHCO<sub>3</sub> and the insoluble residues were filtered off through a Celite pad. After the solvent was removed in vacuo, the residue was purified by a silica gel column chromatography, eluted with CHCl<sub>3</sub>/MeOH (9:1) to give compound **10** (684 mg, 52%) as white foam. IR (KBr):  $\nu$  3331 (-OH), 2979 (Ar C-H), 1750 (C=O), 1651 (C=N) cm<sup>-1</sup>; [ $\alpha$ ]<sub>D</sub><sup>24</sup> 55.7 (c 1.00, MeOH); <sup>1</sup>H-NMR (300 MHz, CD<sub>3</sub>OD):  $\delta$  8.37 (1H, d, *J* = 7.5 Hz), 7.68 (2H, d, *J* = 8.0 Hz), 7.32 (2H, d, *J* = 8.0 Hz), 7.22 (H, d, *J* = 7.5 Hz), 6.15 (1H, t, *J* = 6.0 Hz), 5.14 (2H, s), 4.37-4.29 (1H, m), 4.00-3.92 (1H, m), 3.79 (1H, dd, *J* = 3.0, 12.0 Hz), 3.69 (1H, dd, *J* = 3.0, 12.0 Hz), 2.49-2.38 (1H, m), 2.17-2.06 (1H, m), 1.26 (12H, s); <sup>13</sup>C-NMR (75 MHz, CDCl<sub>3</sub>):  $\delta$  163.7, 156.6, 156.5, 153.4, 144.9, 139.2, 134.9, 128.5, 128.4, 128.2, 127.2(3), 127.1(6), 95.6, 88.3, 87.5, 84.1, 70.5, 67.3, 61.4, 41.4, 24.2, 24.0, 17.4; FAB-LRMS *m/z* = 488 (MH<sup>+</sup>); FAB-HRMS calcd for C<sub>23</sub>H<sub>31</sub>N<sub>3</sub>O<sub>8</sub>B= 488.2119, found 488.2216; MS (FAB) *m/z* 488 [M+H]<sup>+</sup>; HRMS (FAB): Calcd for C<sub>23</sub>H<sub>31</sub>N<sub>3</sub>O<sub>8</sub>B [M+H]<sup>+</sup>: 488.2119. Found: 488.2119.

### 1-10. 5'-O-(4,4'-Dimethoxytrityl)-(4-(4,4,5,5-tetramethyl-1,3,2-dioxaborolan-2-yl)benzyl)-2'-deoxy thymidine (21)

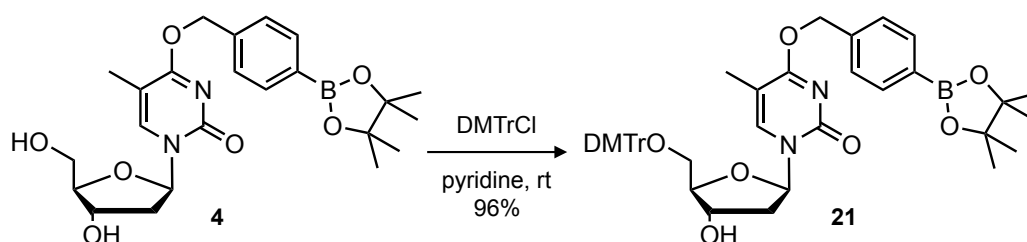

Compound **4** (450 mg, 0.945 mmol) was dissolved in dry pyridine (10 mL) and DMTrCl (384 mg, 1.13 mmol) was added at room temperature. The reaction mixture was stirred for 3 h at room temperature and quenched by addition of MeOH at 0 °C with 10 min. stirring. After the solvent was removed in vacuo, the residue was purified by a silica gel column chromatography, eluted with CHCl<sub>3</sub>/MeOH (19:1 with 0.5% Et<sub>3</sub>N) to give compound **21** (705 mg, 96%) as a white foam. IR (KBr):  $\nu$  3455 (-OH), 2978 (Ar C-H), 1700 (C=O), 1642 (C=N) cm<sup>-1</sup> [ $\alpha$ ]<sub>D</sub><sup>24</sup> 8.8 (c 1.00, CHCl<sub>3</sub>); <sup>1</sup>H-NMR (300 MHz, CDCl<sub>3</sub>):  $\delta$  8.54-8.50 (2H, m), 7.79-7.74 (2H, m), 7.69-7.63 (2H, m), 7.51-7.38 (4H, m), 7.32-7.18 (6H, m), 6.85-6.78 (4H, m), 6.50-6.42 (1H, m), 5.11 (2H, s), 4.63-4.57 (1H, m), 4.12-4.07 (1H, m), 3.74 (6H, s), 3.51-3.45 (1H, m), 3.38-3.31 (1H, m), 2.48-2.24 (2H, m), 1.55 (3H, s), 1.31 (12H, s); <sup>13</sup>C-NMR (75 MHz, CDCl<sub>3</sub>):  $\delta$  163.3, 163.2, 158.4, 150.7, 150.6, 149.1, 144.2, 139.8, 136.7, 136.2, 135.2, 135.1, 134.7, 133.8, 129.9, 128.9, 128.2, 128.1, 127.9, 127.7, 127.3, 126.9, 123.8, 113.0, 110.1, 110.0, 86.6, 86.1, 85.3, 83.5, 77.2, 74.7, 71.4, 63.3, 55.0, 44.3, 41.0, 24.6, 12.4; MS (FAB) *m/z* 783 [M+Na]<sup>+</sup>; HRMS (FAB): Calcd for C<sub>44</sub>H<sub>49</sub>N<sub>2</sub>O<sub>9</sub>BNa [M+Na]<sup>+</sup>: 783.3429. Found: 783.3436.

**1-11. 3-O-{2-Cyanoethyl(diisopropylamino)phosphino}-5'-O-(4,4'-dimethoxytrityl)- (4-(4,4,5,5-tetramethyl-1,3,2-dioxaborolan-2-yl)benzyl)-2'-deoxy thymidine (11)**

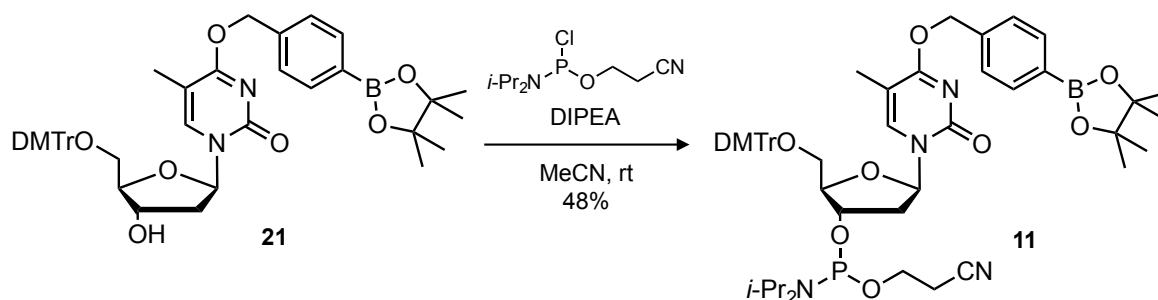

Compound **21** (663 mg, 0.850 mmol) was dissolved in dry DCM (10 mL) and *N,N*-diisopropylamine (440  $\mu$ L, 2.55 mmol) and 2-cyanoethyl-*N,N'*-diisopropylchlorophosphoramidite (230  $\mu$ L, 1.02 mmol) were added at room temperature. The reaction mixture was stirred for 2 h and partitioned between AcOEt and H<sub>2</sub>O. The separated organic layer was washed with brine, dried over Na<sub>2</sub>SO<sub>4</sub> and concentrated in vacuo. The residue was purified by a silica gel column chromatography, eluted with hexane/AcOEt (6:4) to give compound **11** (400 mg, 48%) as a white foam. IR (KBr):  $\nu$  2244 (C $\equiv$ N), 1671 (C=N) cm<sup>-1</sup> <sup>1</sup>H-NMR (300 MHz, CDCl<sub>3</sub>):  $\delta$  8.03-7.93 (1H, m), 7.83 (2H, d, *J* = 7.5 Hz), 7.48-7.39 (4H, m), 7.35-7.24 (7H, m), 6.89-6.79 (4H, m), 6.49-6.36 (1H, m), 5.43 (2H, s), 4.78-4.59 (1H, m), 4.30-4.17 (1H, m), 3.77 (3H, s), 3.76 (3H, s), 3.66-3.45 (4H, m), 3.45-3.27 (2H, m), 2.79-2.26 (4H, m), 1.49 (3H, s), 1.34 (12H, s), 1.26-1.03 (12H, m); <sup>13</sup>C-NMR (75 MHz, CDCl<sub>3</sub>):  $\delta$  169.8, 169.7, 158.3, 155.5, 155.4, 144.0, 139.6, 138.6, 135.0, 134.9, 134.7, 129.9, 129.8, 127.9, 127.8, 127.6, 126.8, 117.4, 117.2, 112.9, 104.6, 104.5, 86.5, 86.4, 85.9, 83.5, 77.2, 74.5, 68.2,



58.0, 57.8, 54.9, 54.8, 42.9, 42.8 (d,  $J$  (C, P) = 5.0 Hz), 42.7, 24.5, 24.4, 24.3, 24.2, 24.1 (d,  $J$  (C, P) = 7.0 Hz), 20.1, 19.9, 19.8, 19.7, 11.3, 44.9 (d,  $J$  (C, P) = 5.0 Hz), 24.4, 24.3, 22.8, 22.7, 20.2;  $^{31}\text{P}$ -NMR (120 MHz,  $\text{CDCl}_3$ ):  $\delta$  149.57, 148.96; FAB-LRMS  $m/z$  = 961 ( $\text{MH}^+$ ); FAB-HRMS calcd for  $\text{C}_{53}\text{H}_{67}\text{BN}_4\text{O}_{10}\text{P}$  = 961.4688, found 961.4697.

## 2. $^1\text{H}$ -, $^{13}\text{C}$ - and $^{31}\text{P}$ -NMR spectra of new compounds

### 2-1. $^1\text{H}$ spectrum of compound 17

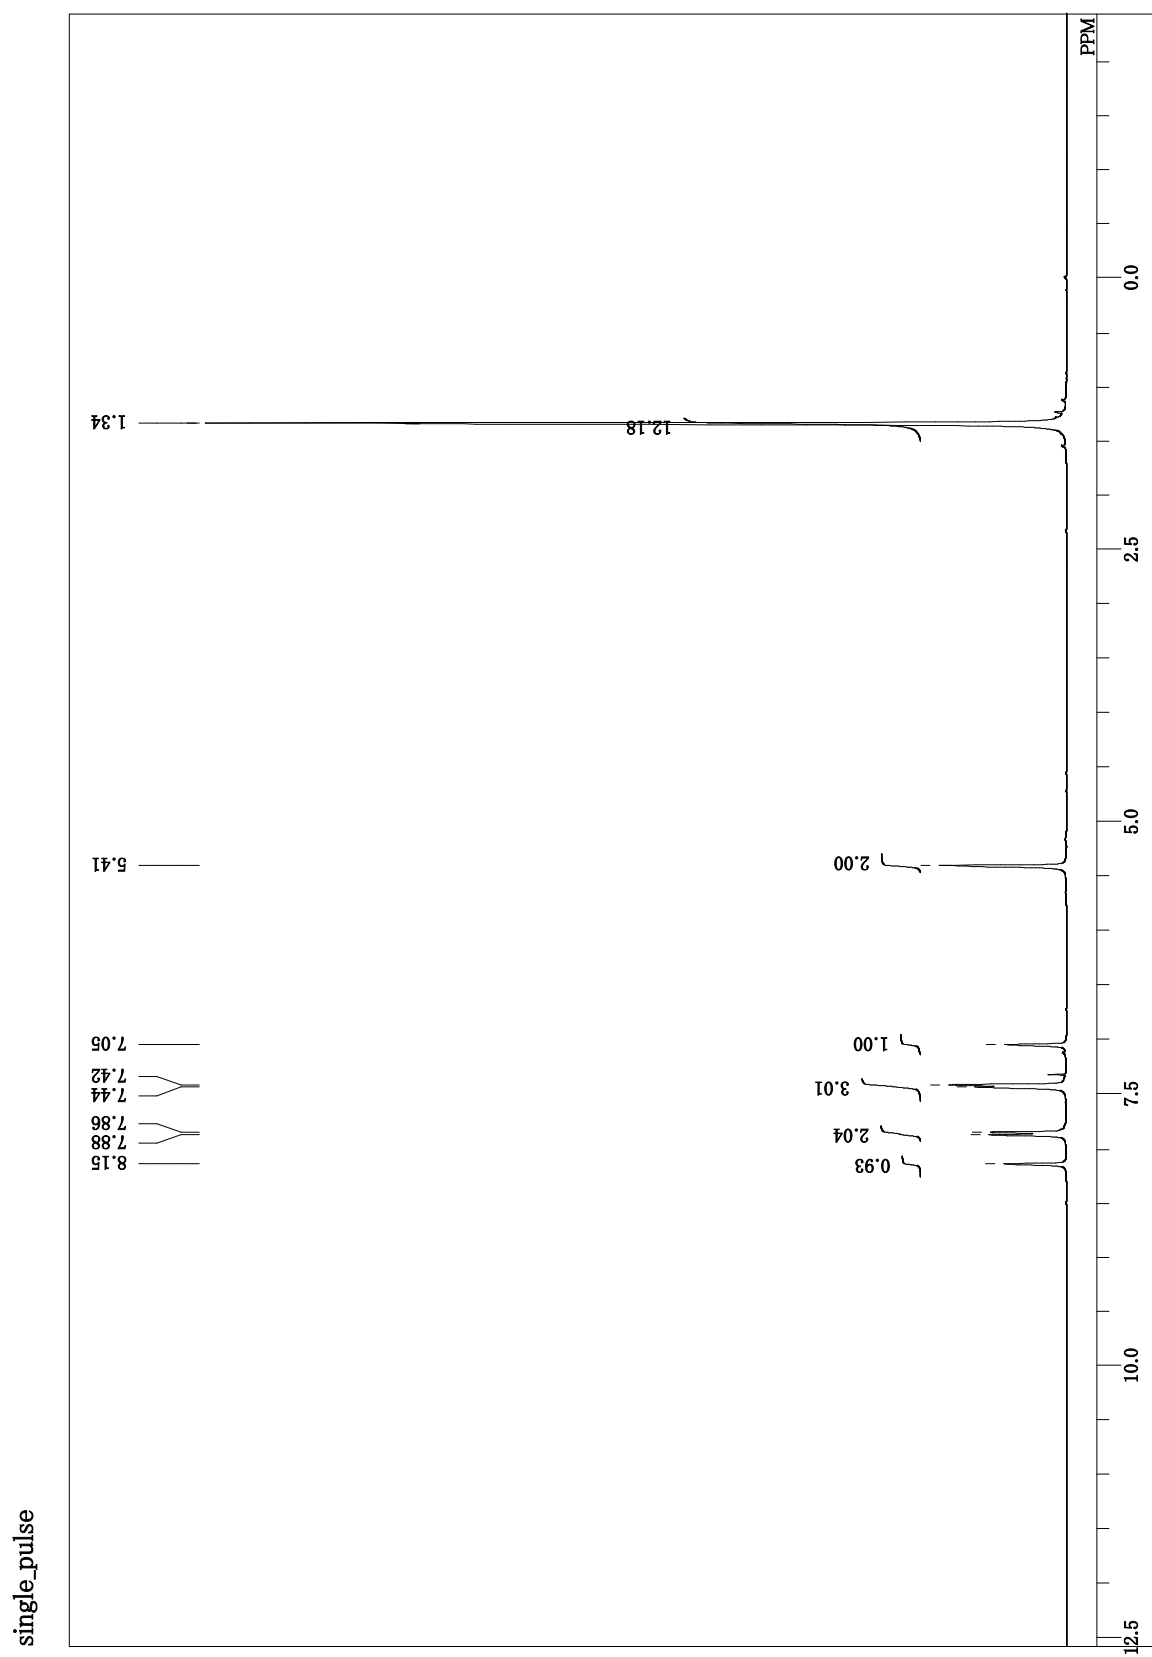

2-2. <sup>13</sup>C spectrum of compound 17

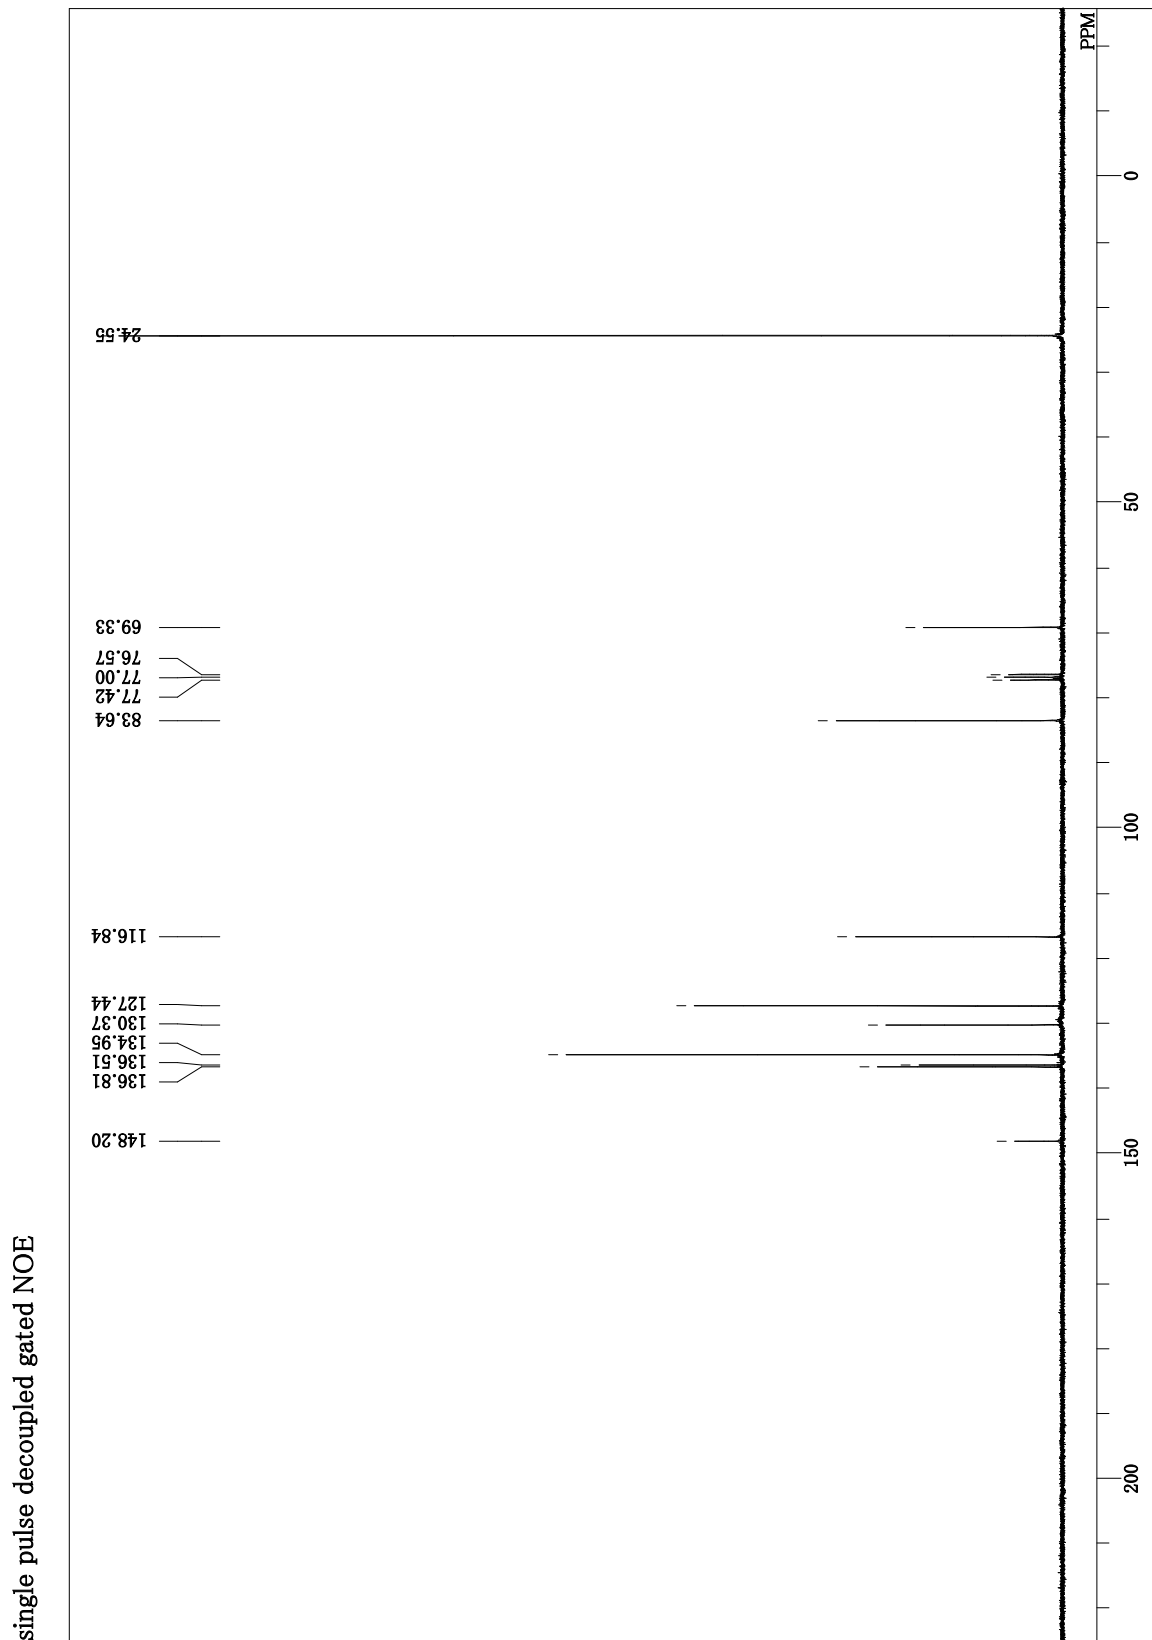

2-3. <sup>1</sup>H spectrum of compound 18

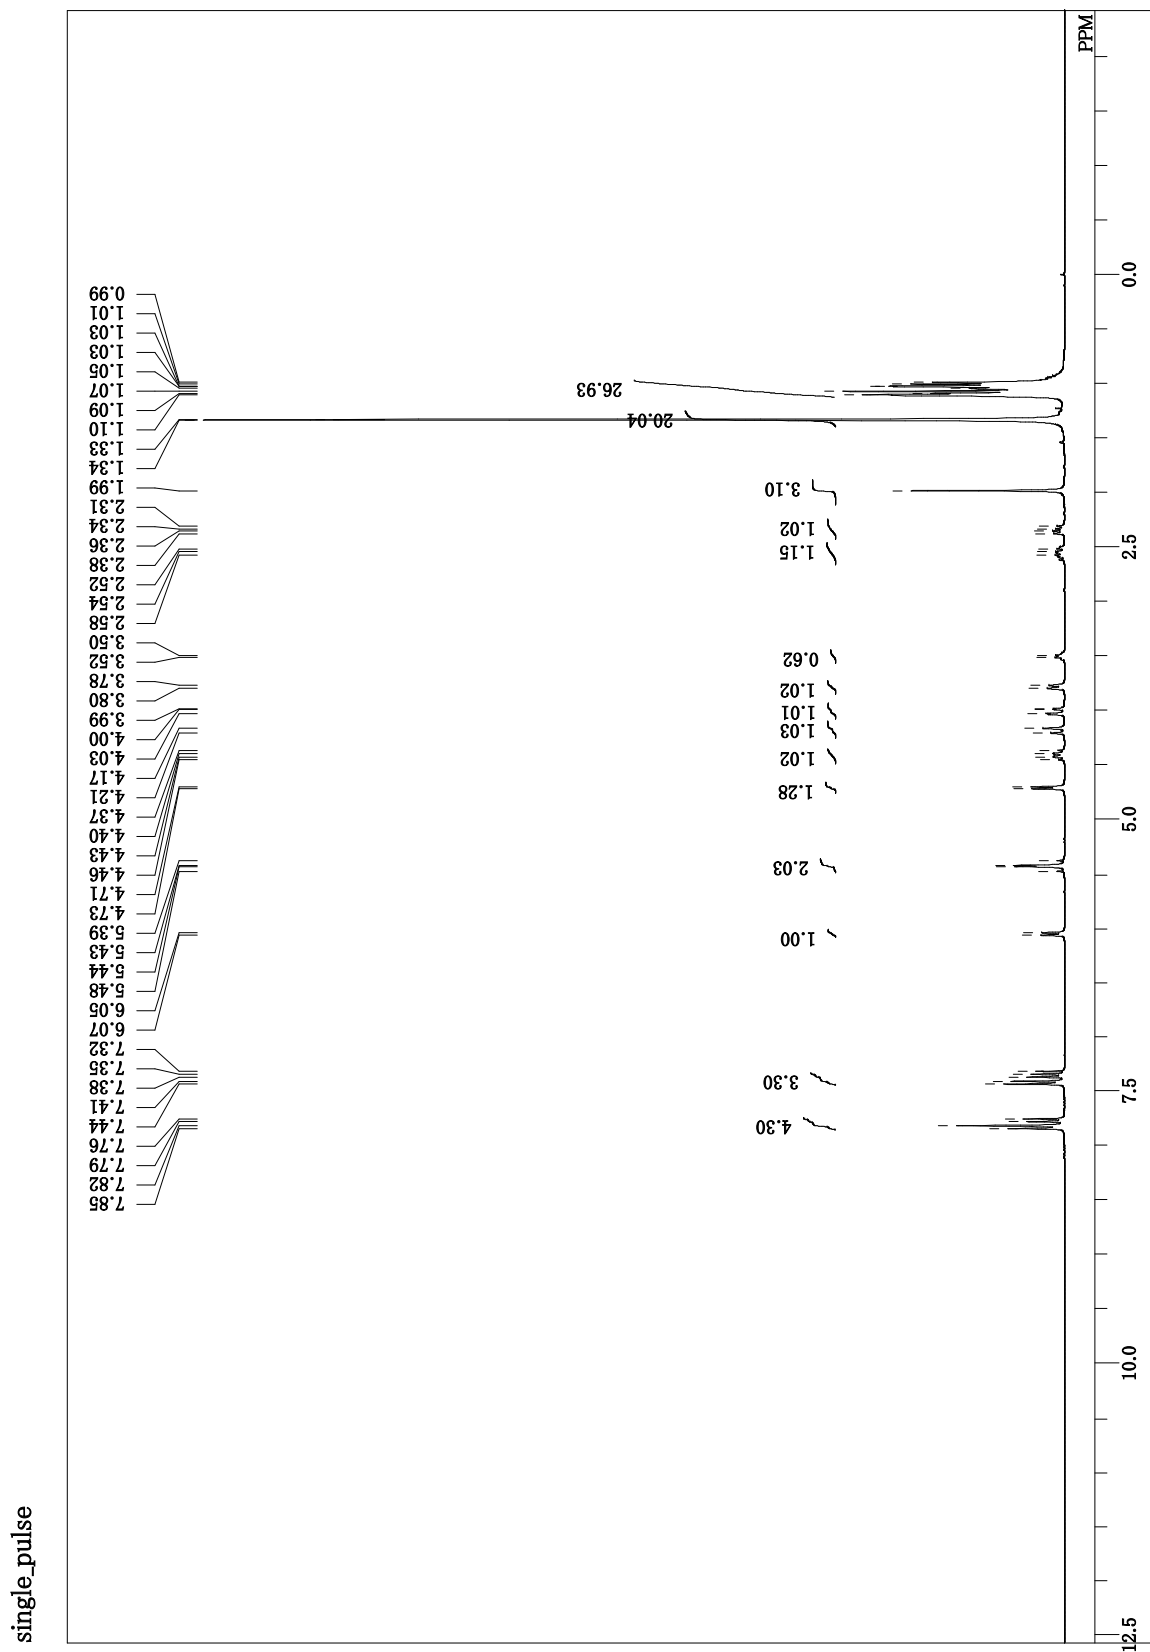

2-4. <sup>13</sup>C spectrum of compound 18

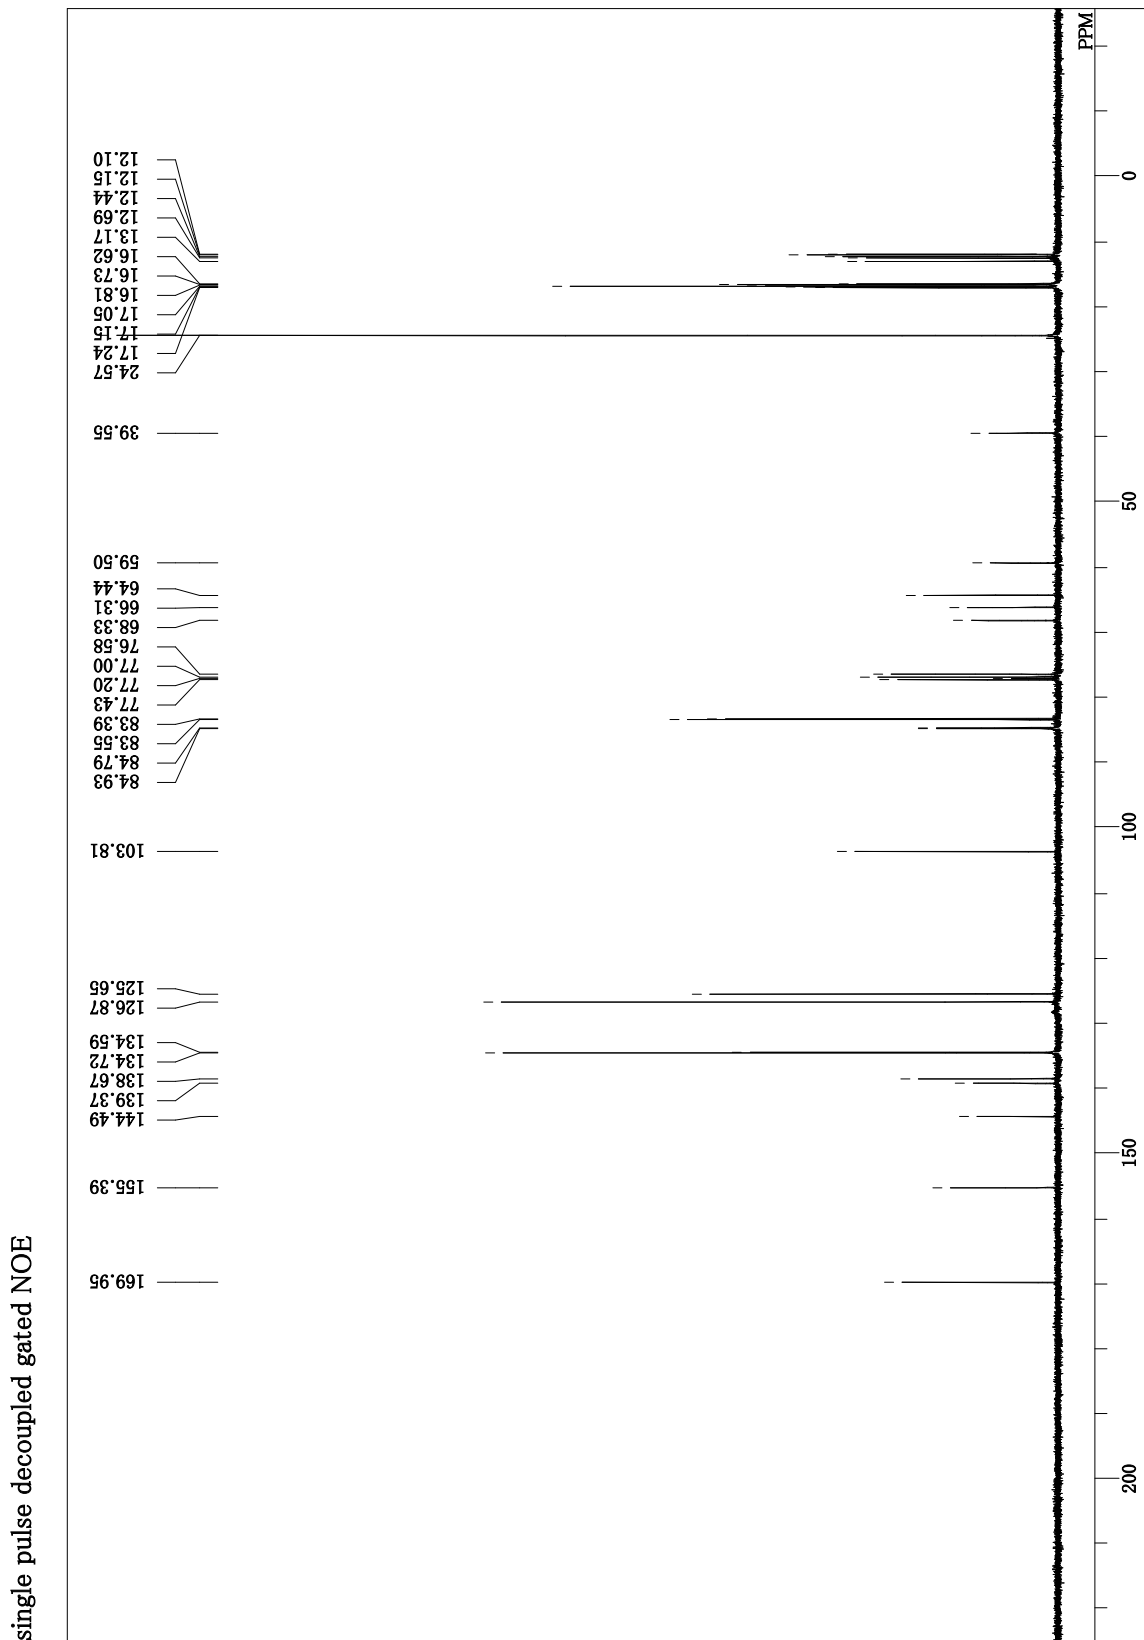

2-5. <sup>1</sup>H spectrum of compound 4

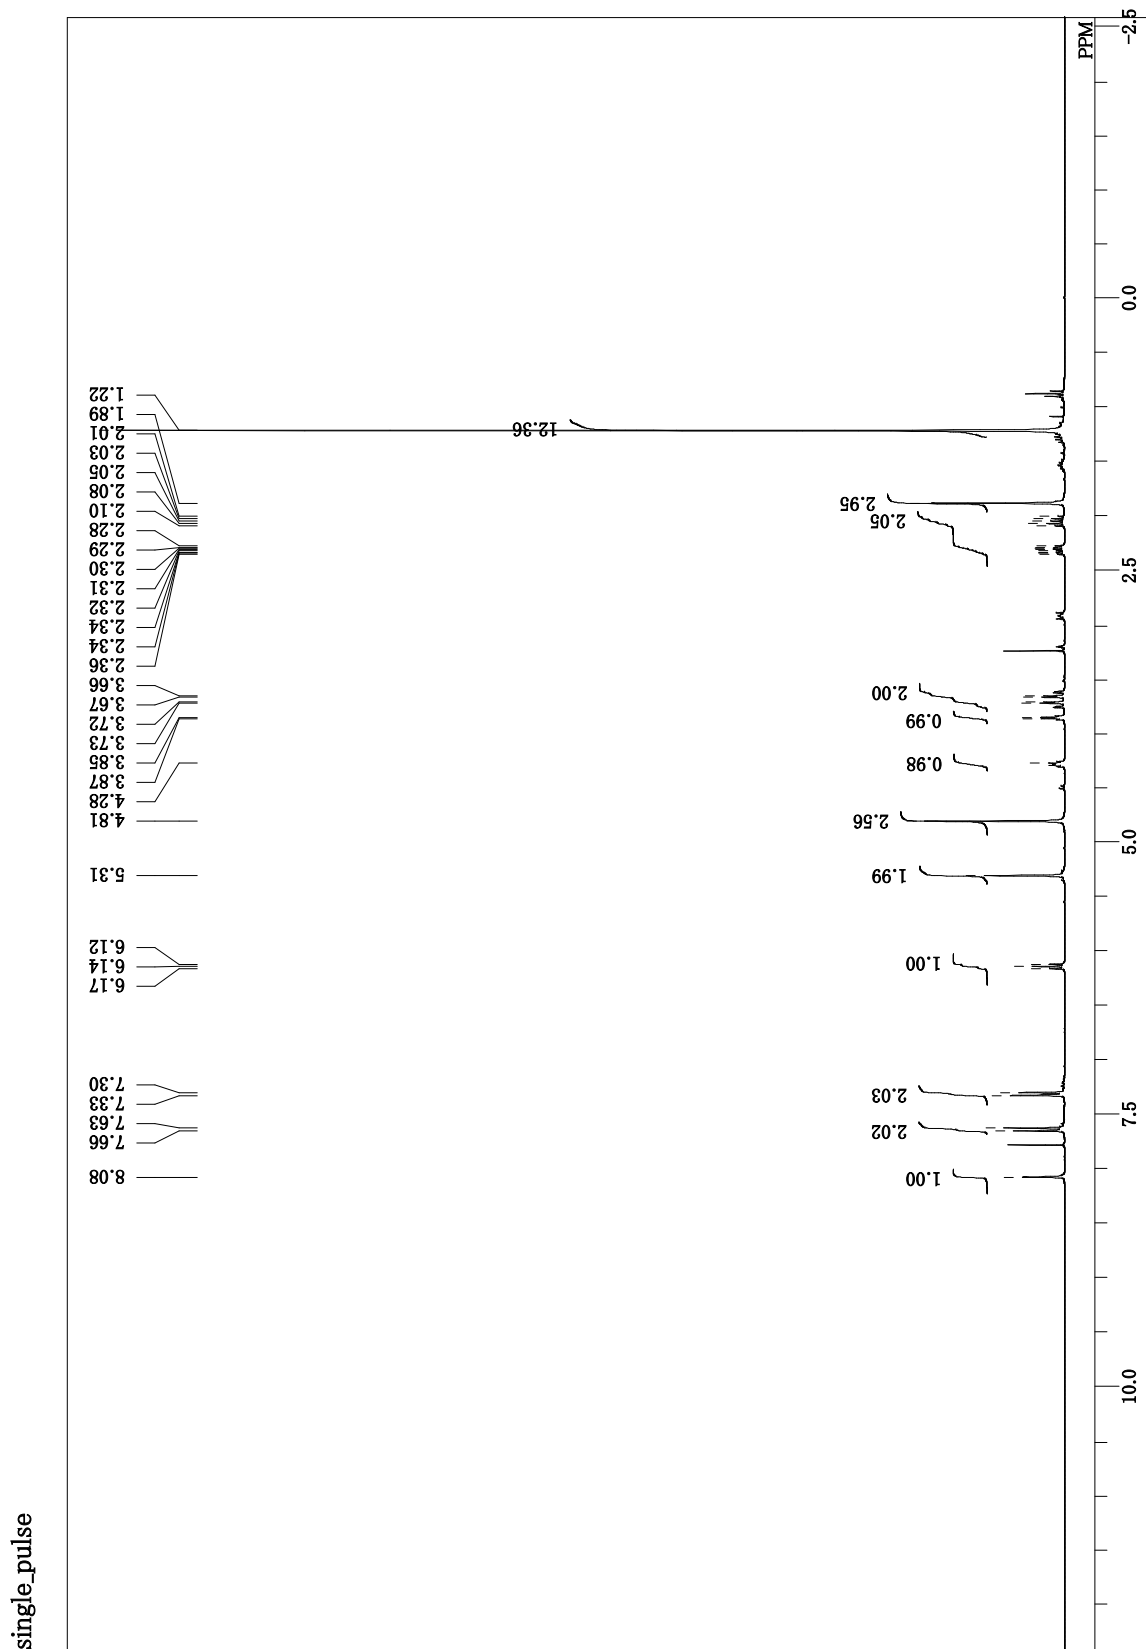

2-6.  $^{13}\text{C}$  spectrum of compound 4

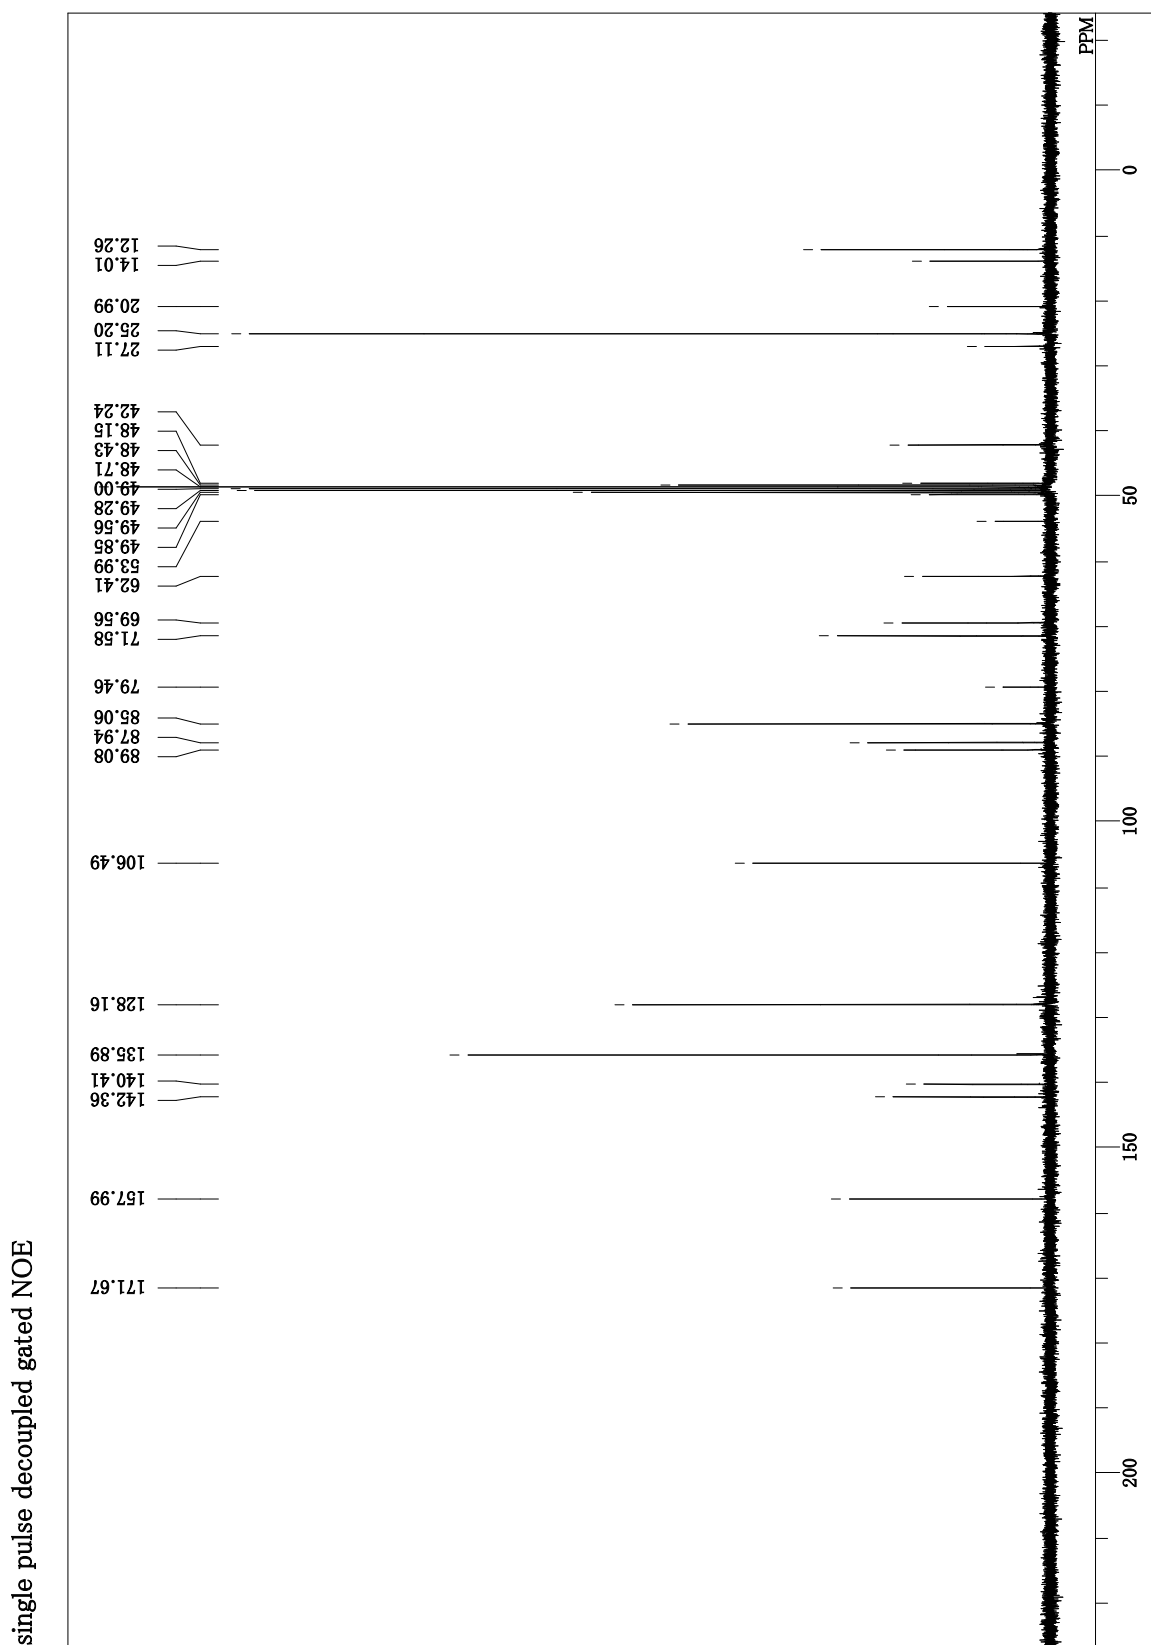

2-7. <sup>1</sup>H spectrum of compound 6

single\_pulse

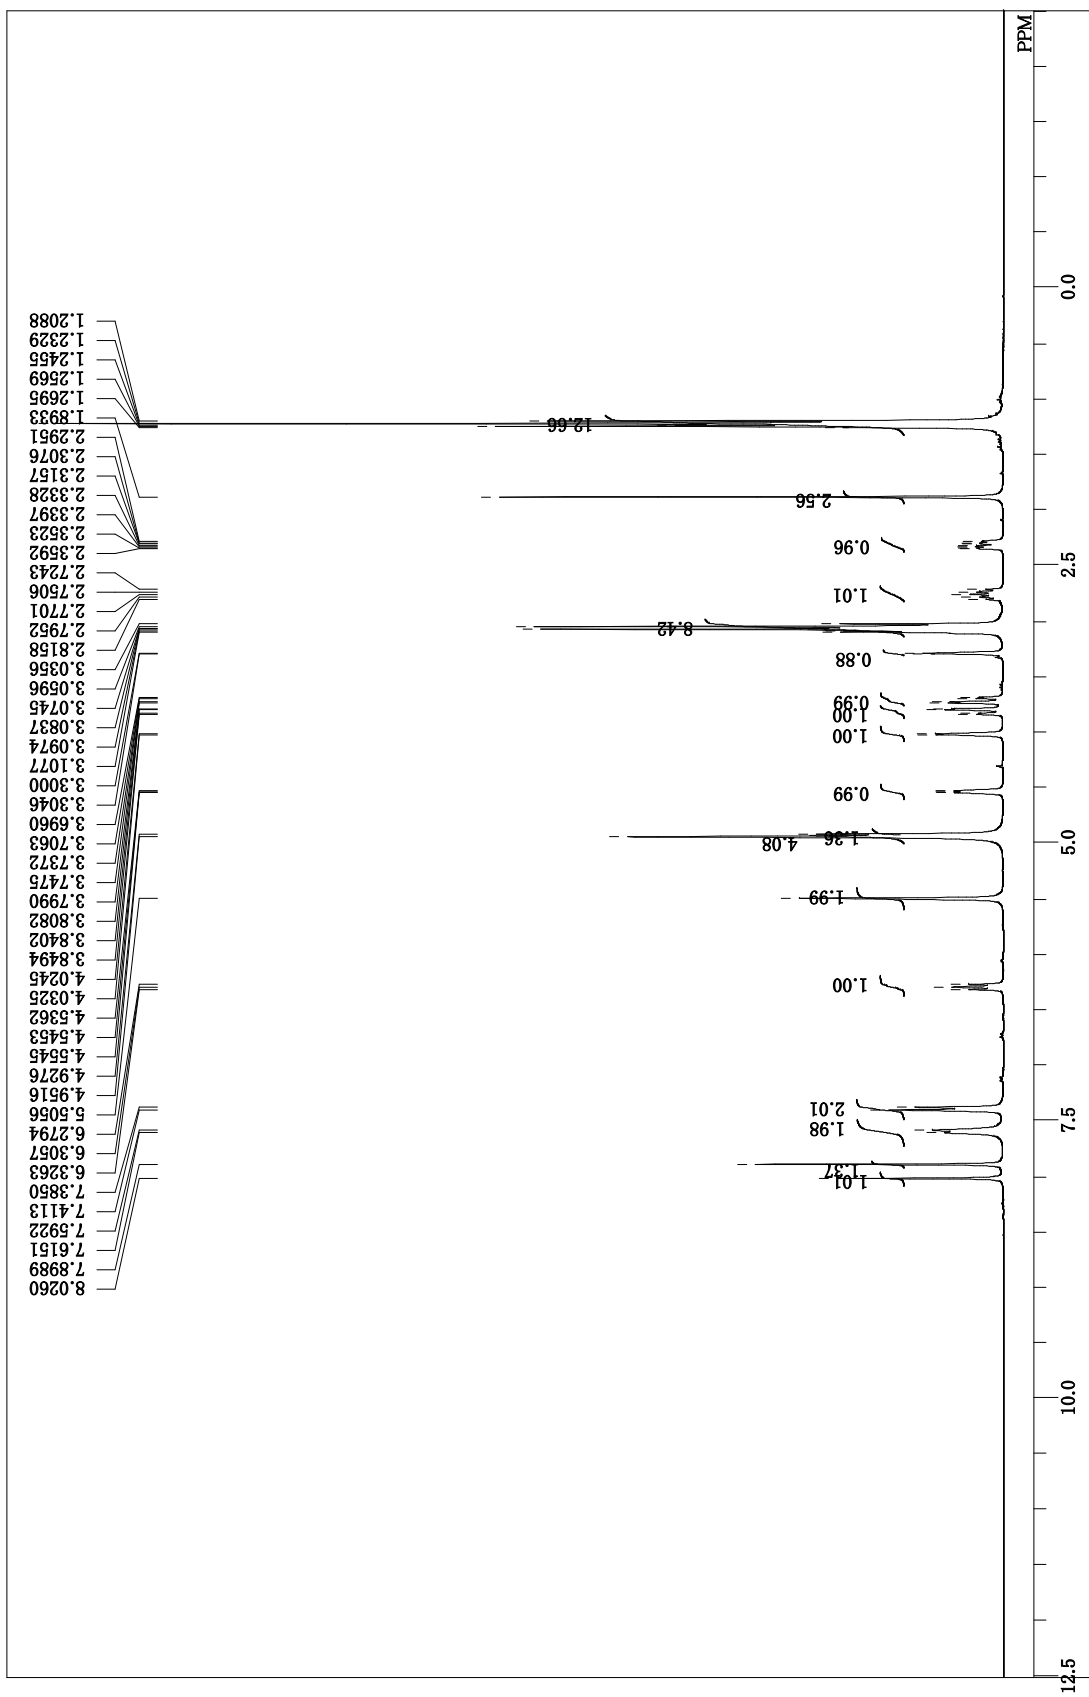



2-8.  $^{13}\text{C}$  spectrum of compound 6

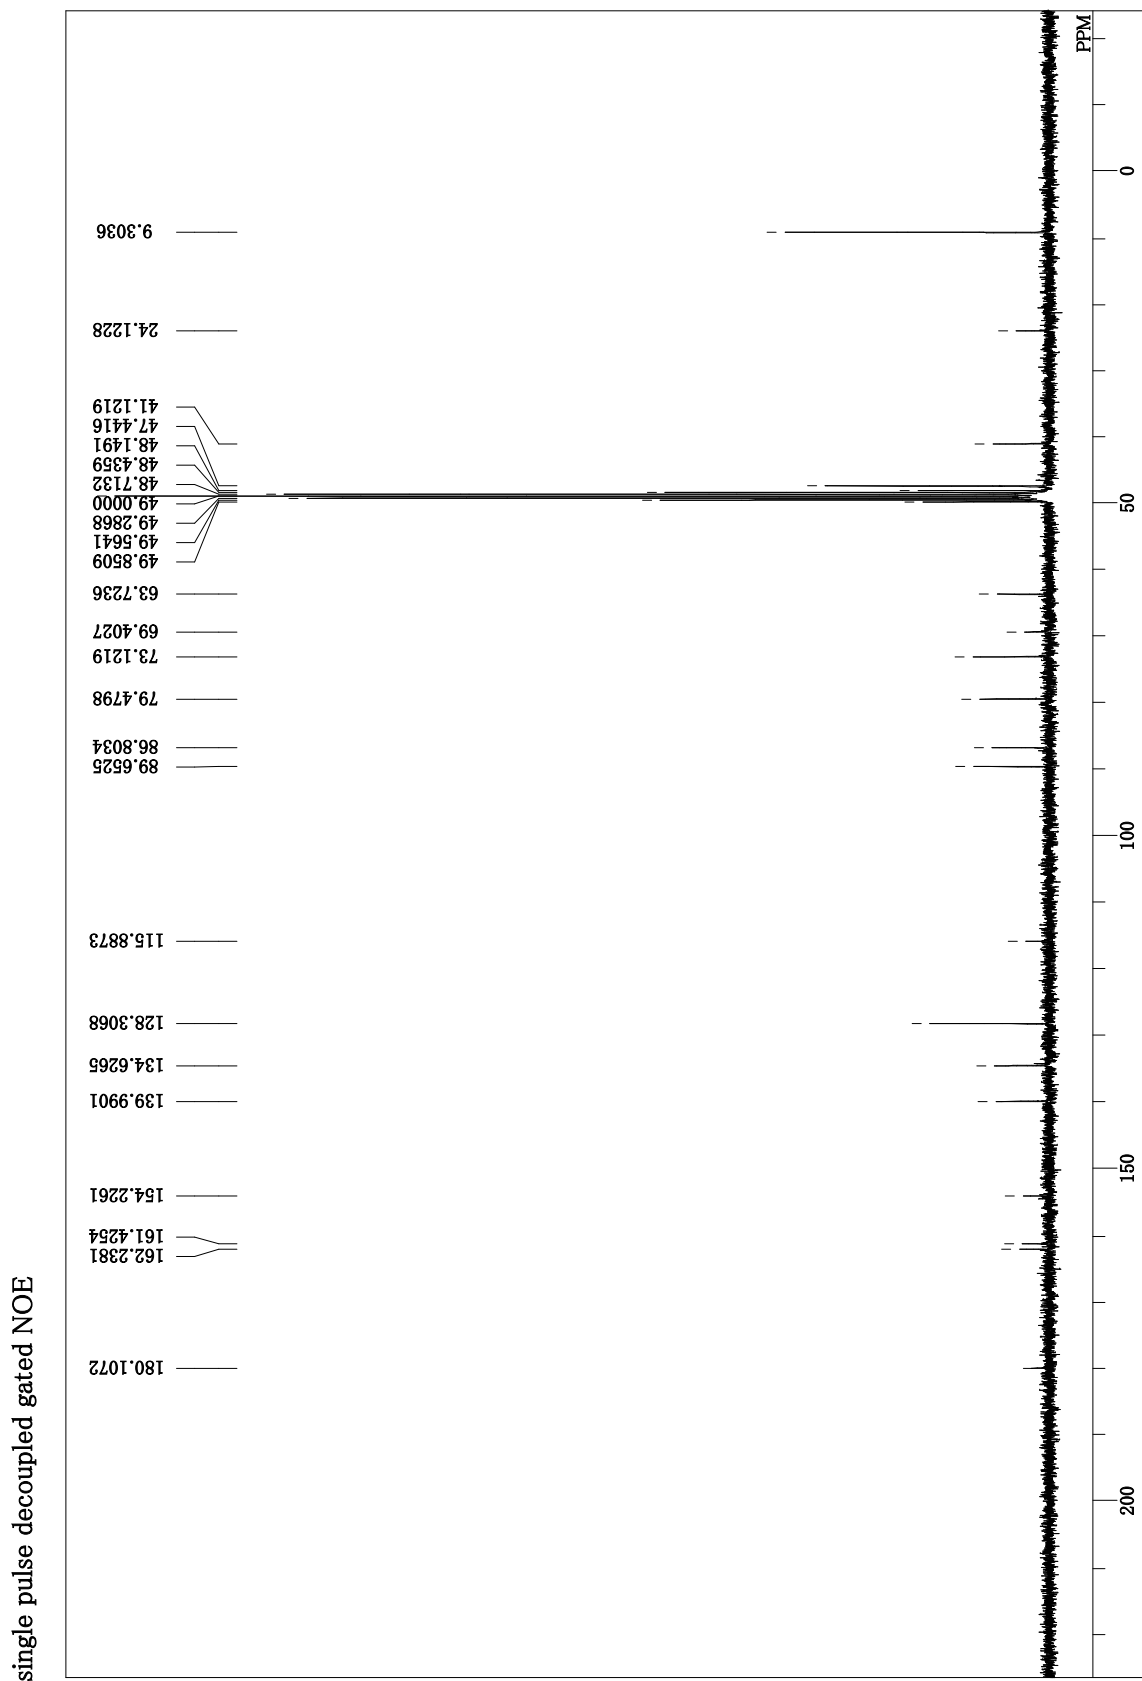

2-9. <sup>1</sup>H spectrum of compound 19

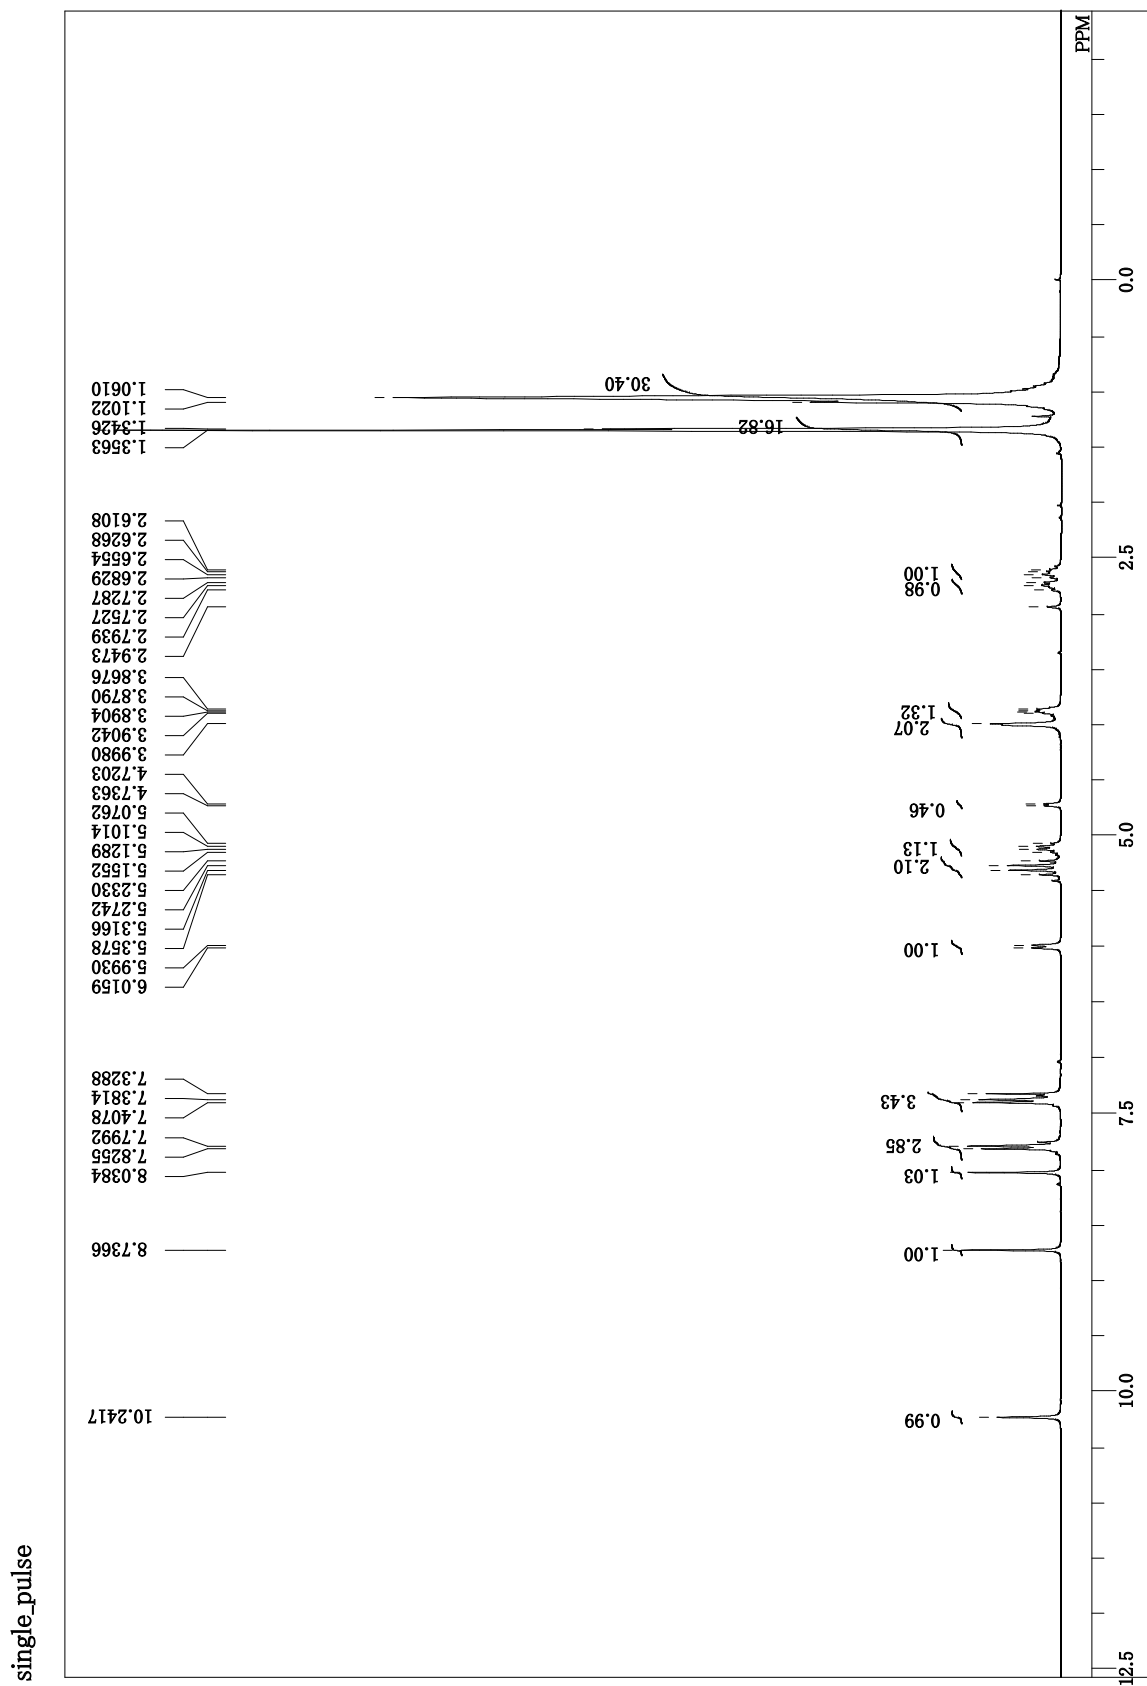

2-10.  $^{13}\text{C}$  spectrum of compound 19

single pulse decoupled gated NOE

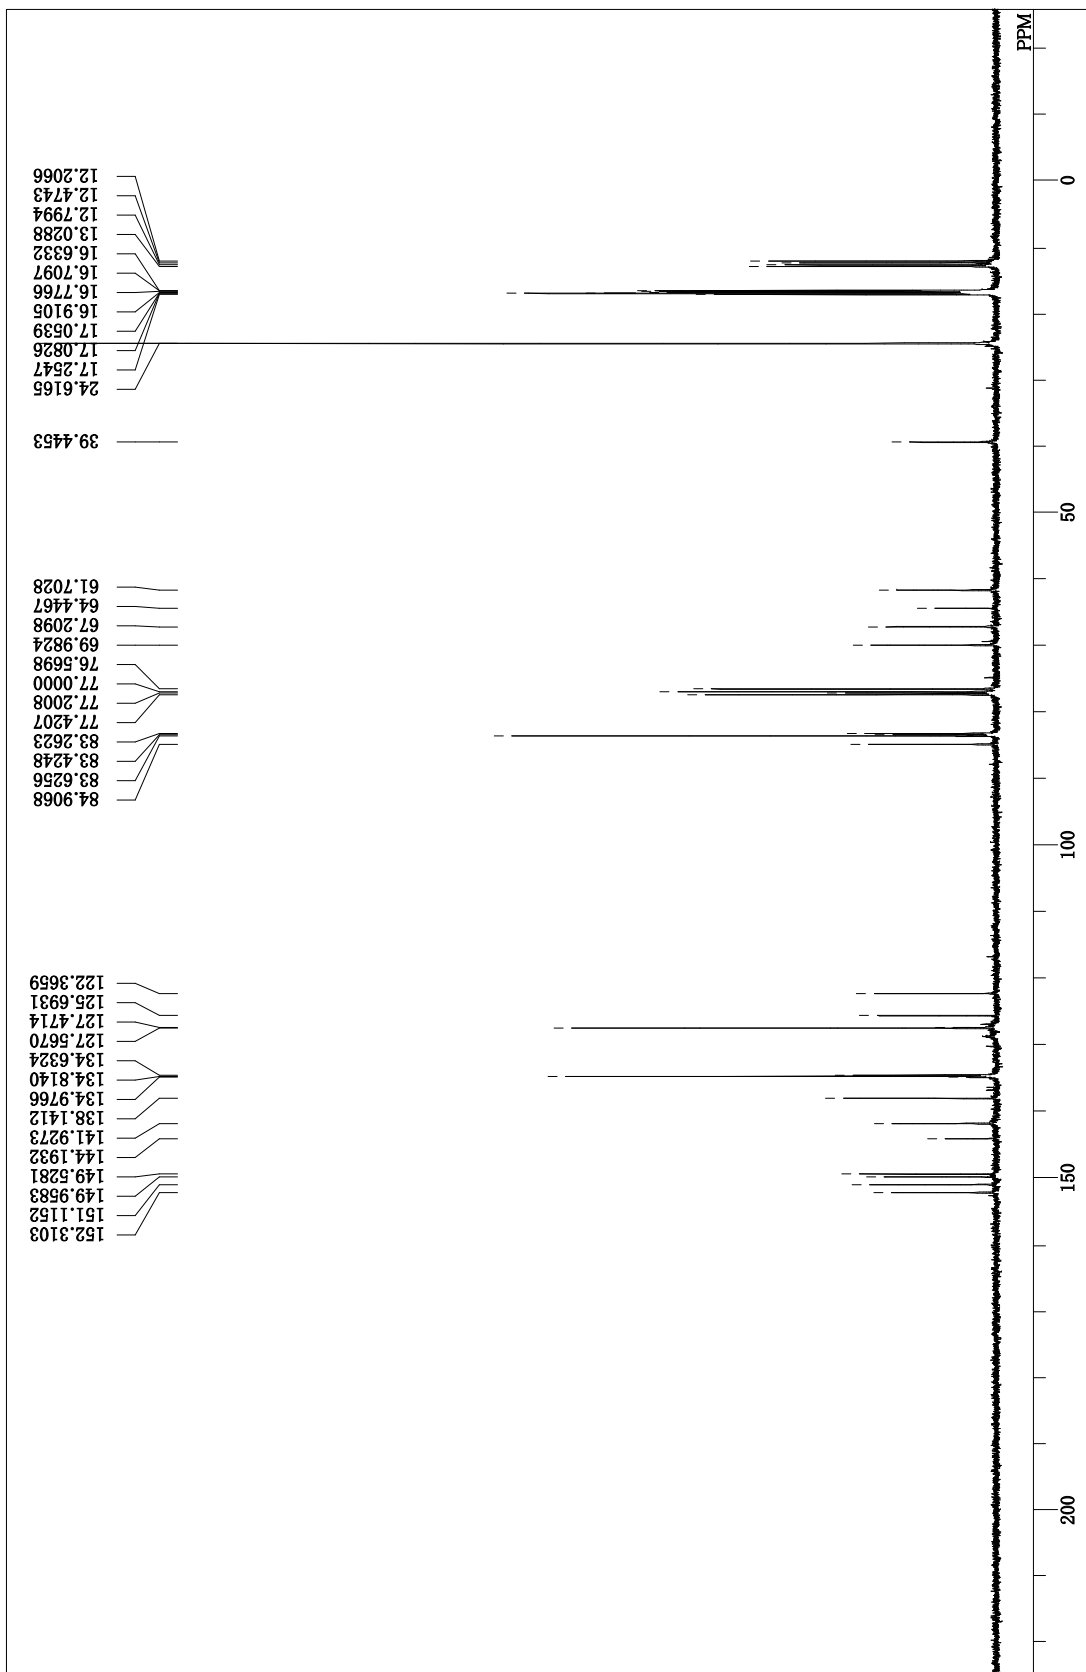

2-11. <sup>1</sup>H spectrum of compound 8

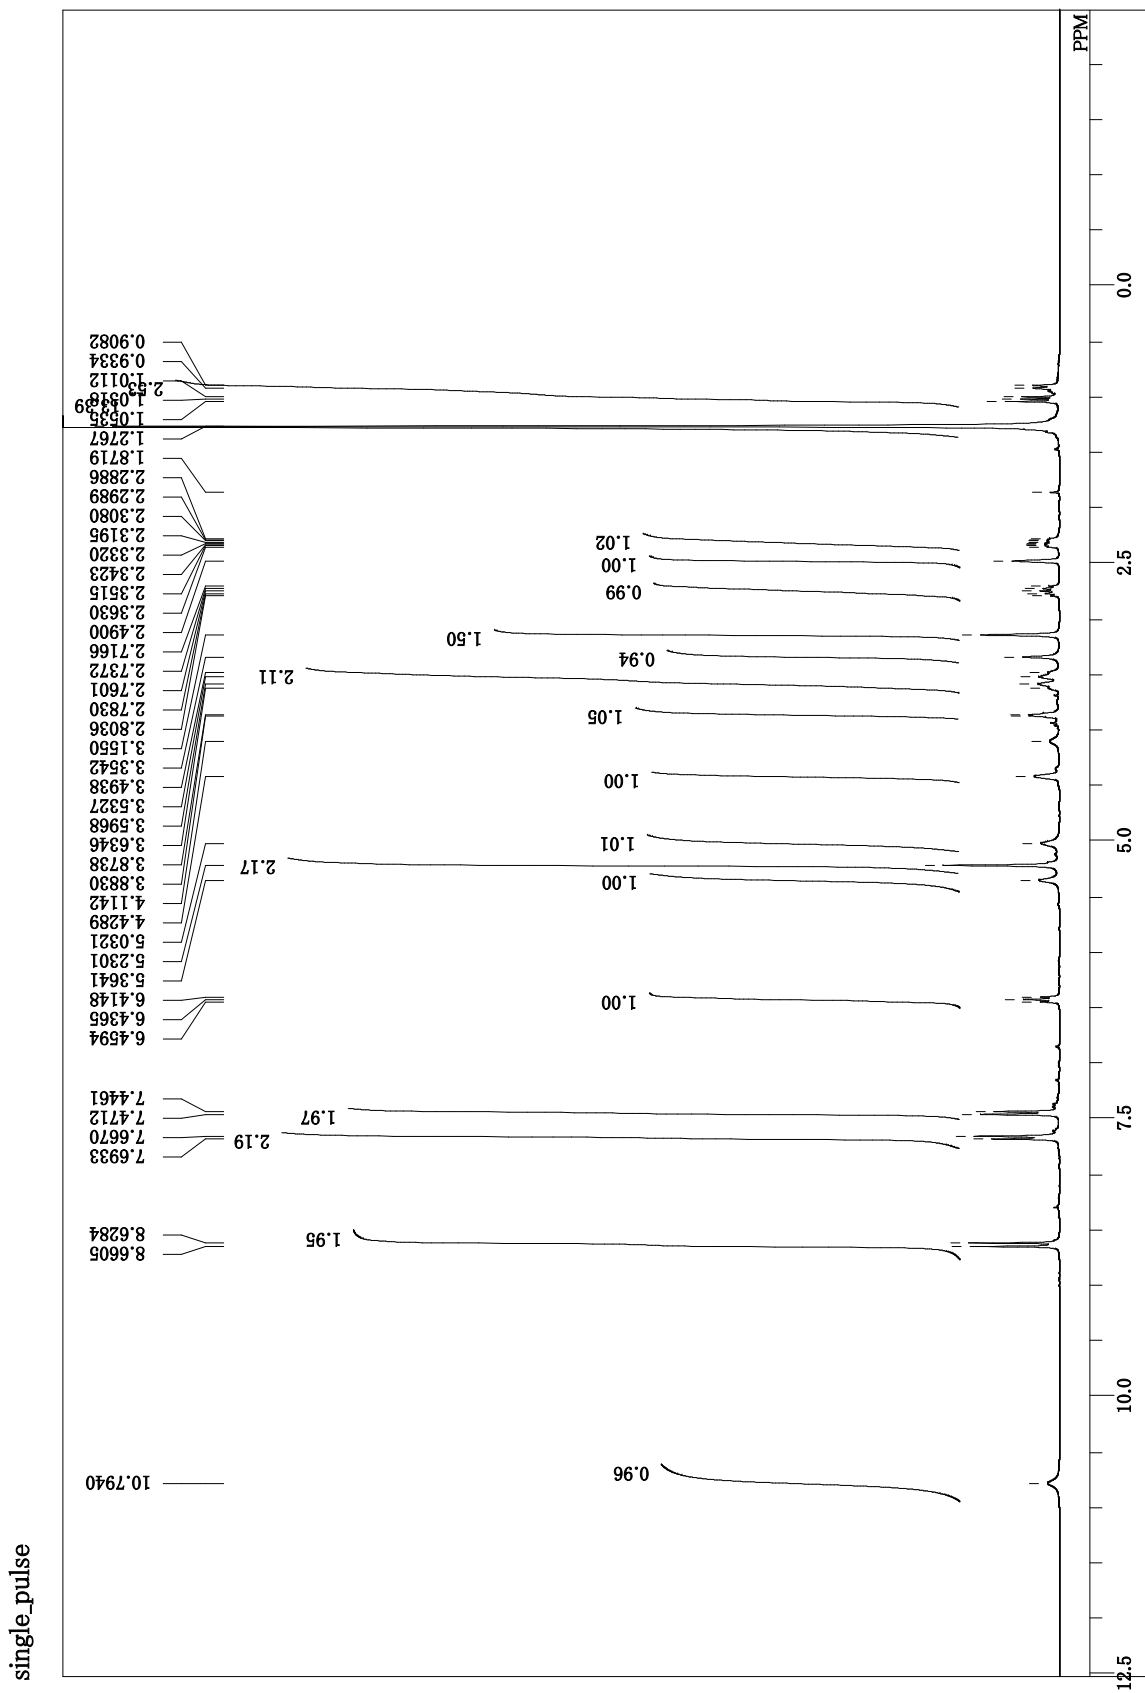

2-12.  $^{13}\text{C}$  spectrum of compound 8

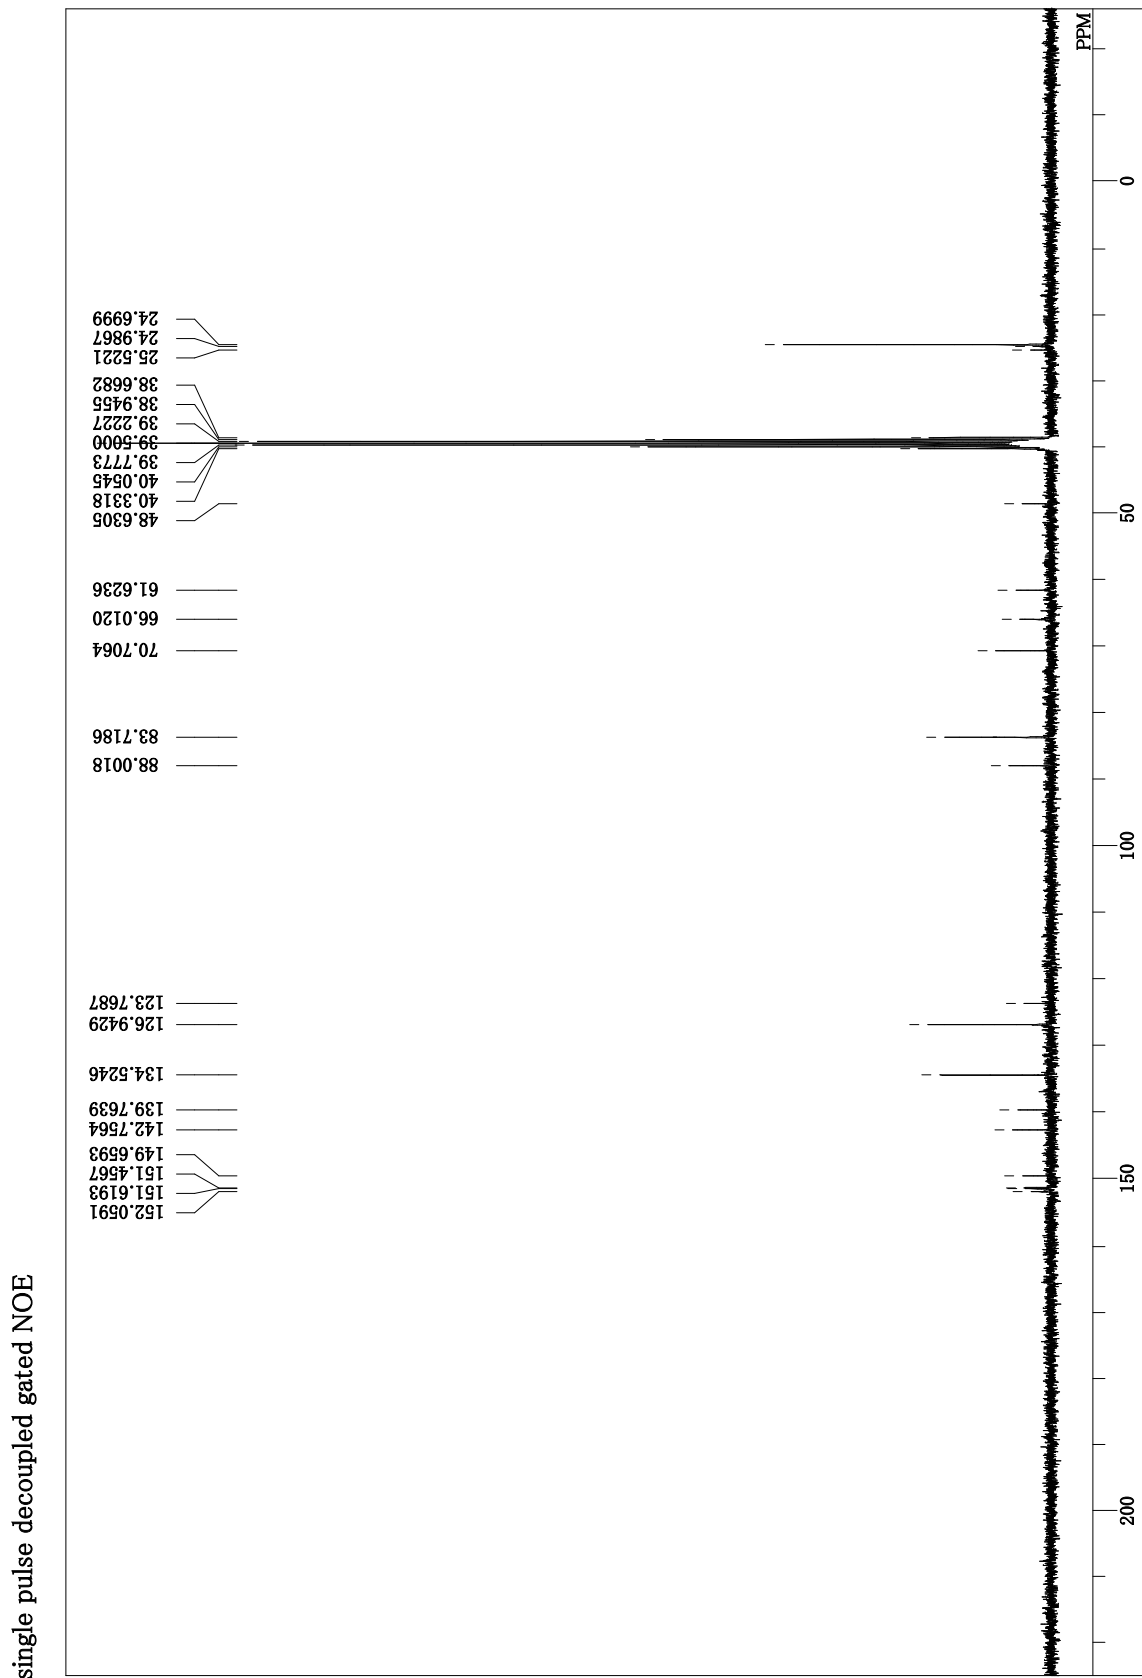

2-13. <sup>1</sup>H spectrum of compound 20

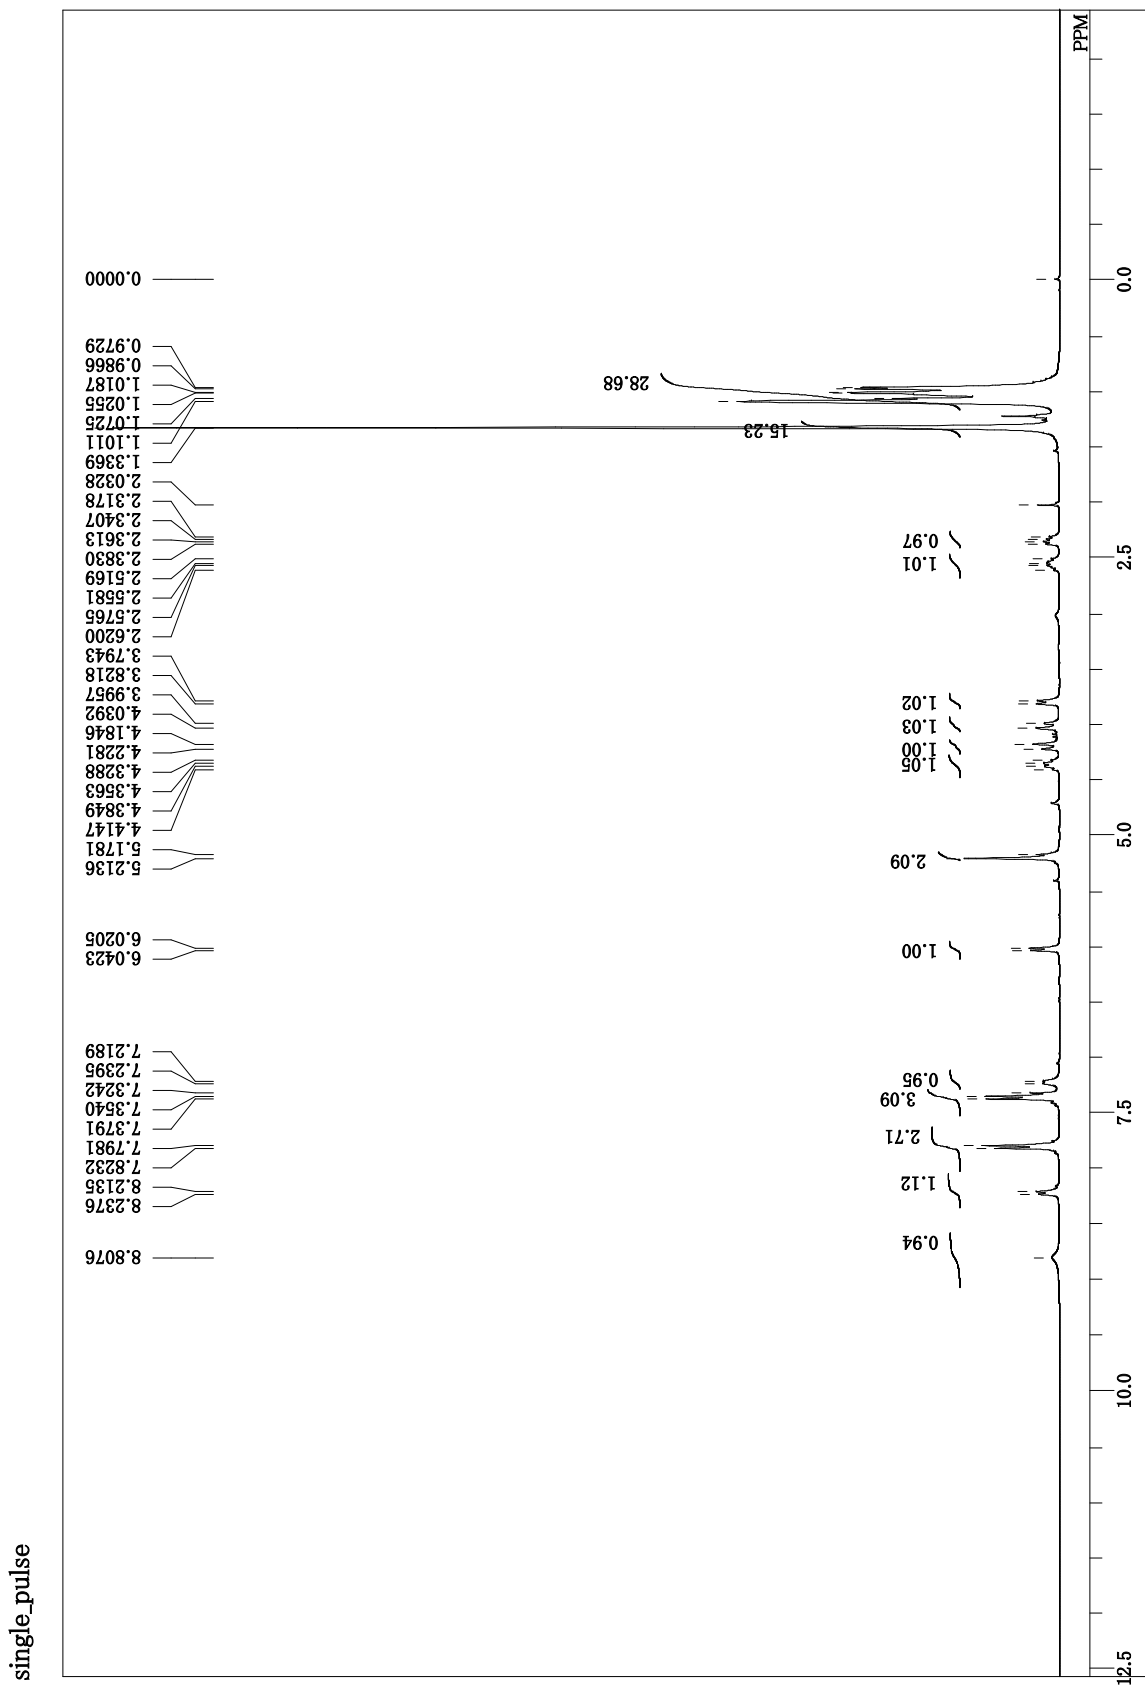

2-14. <sup>13</sup>C spectrum of compound 20

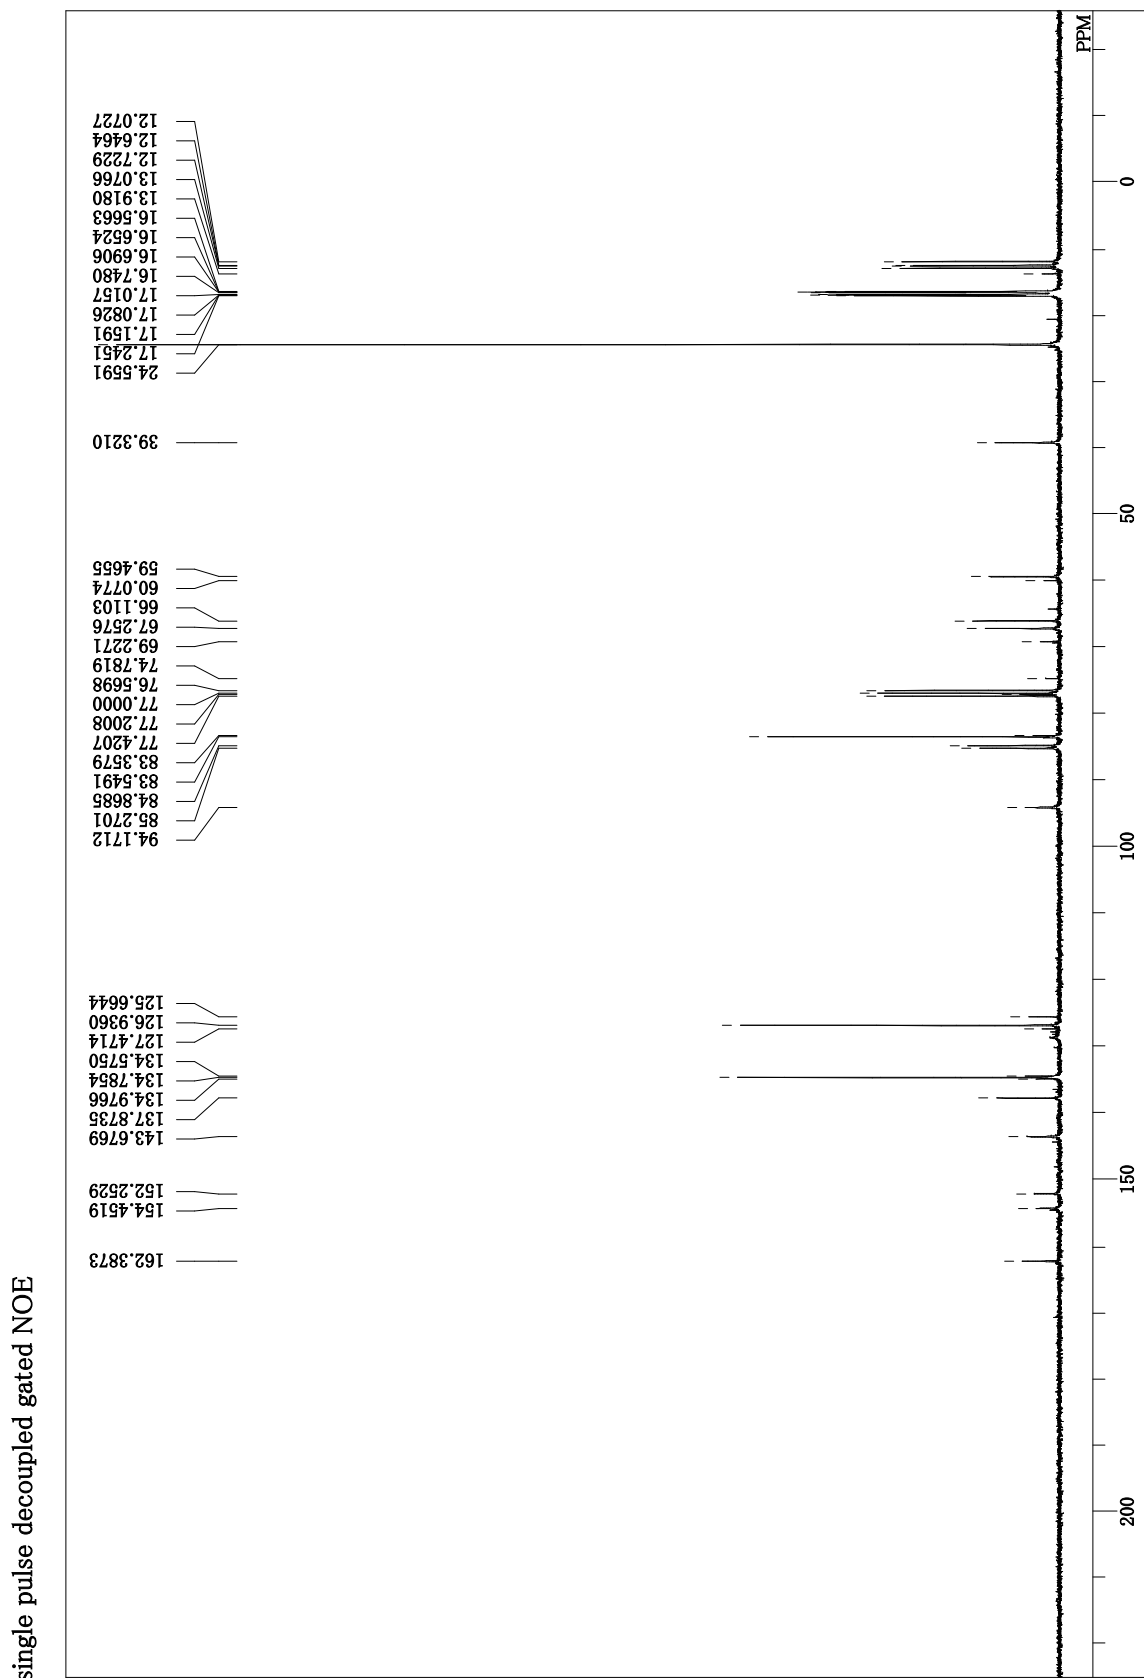

2-15. <sup>1</sup>H spectrum of compound 10

single\_pulse

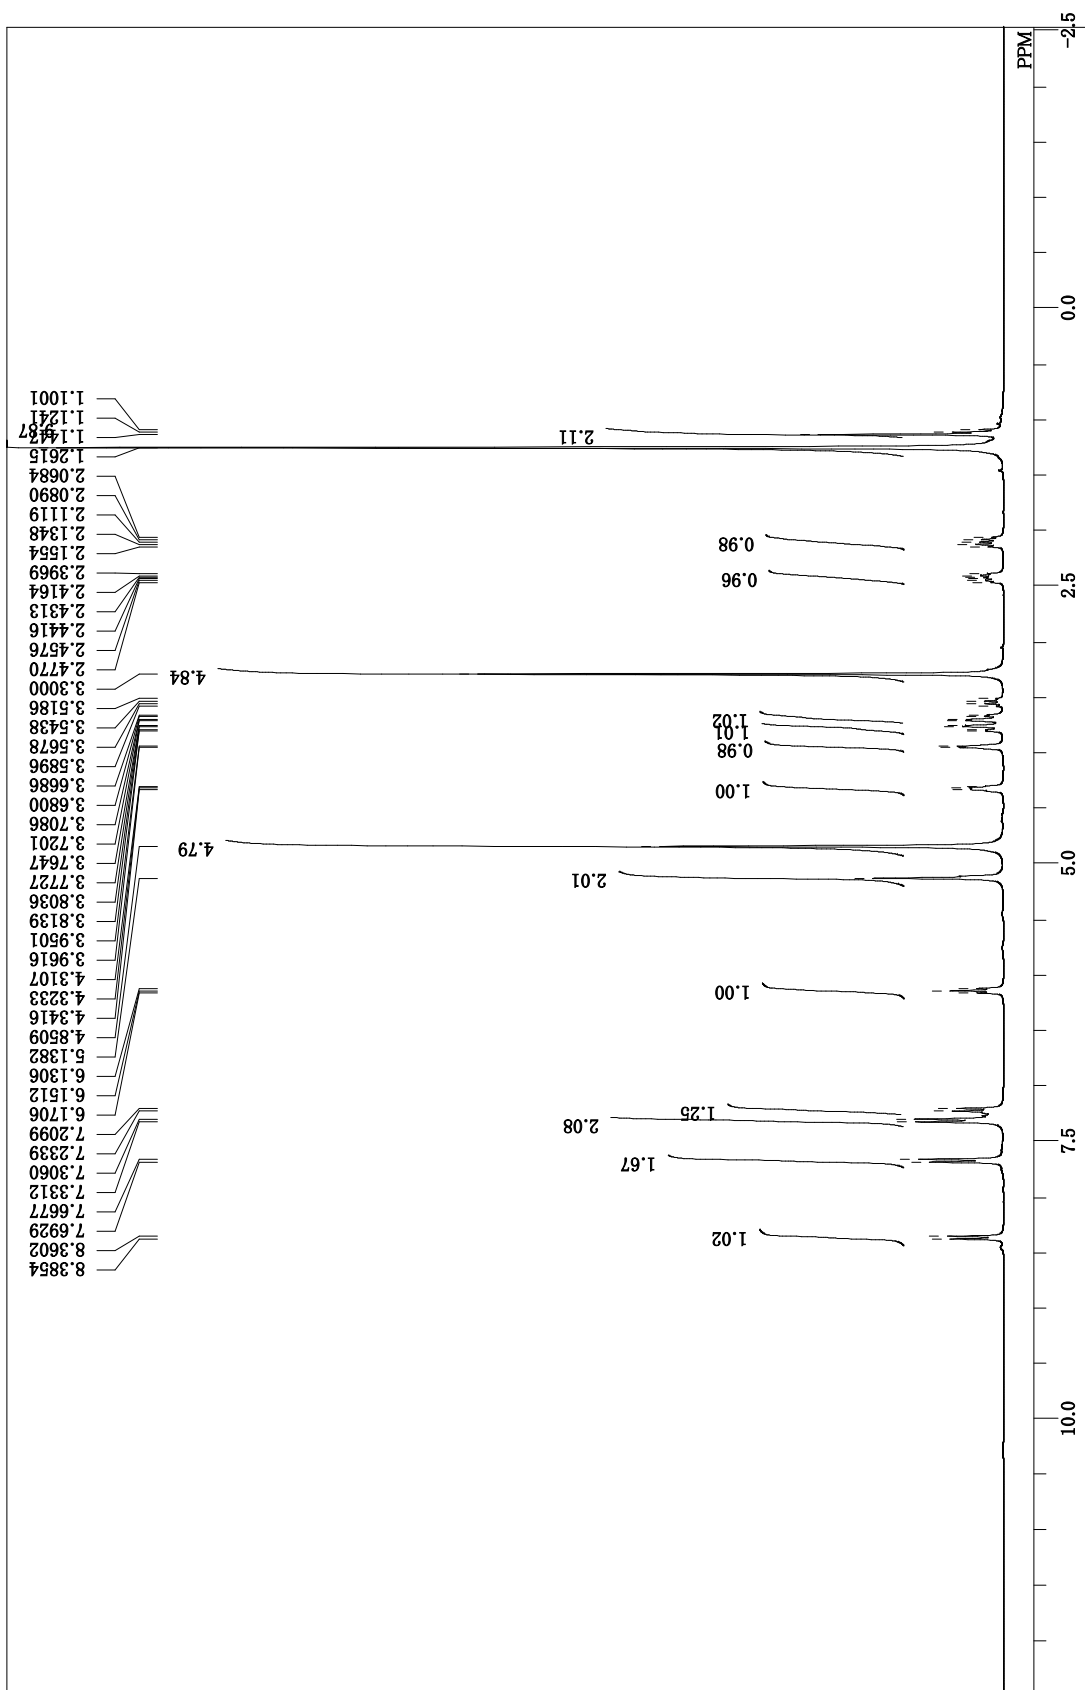



2-16.  $^{13}\text{C}$  spectrum of compound 10

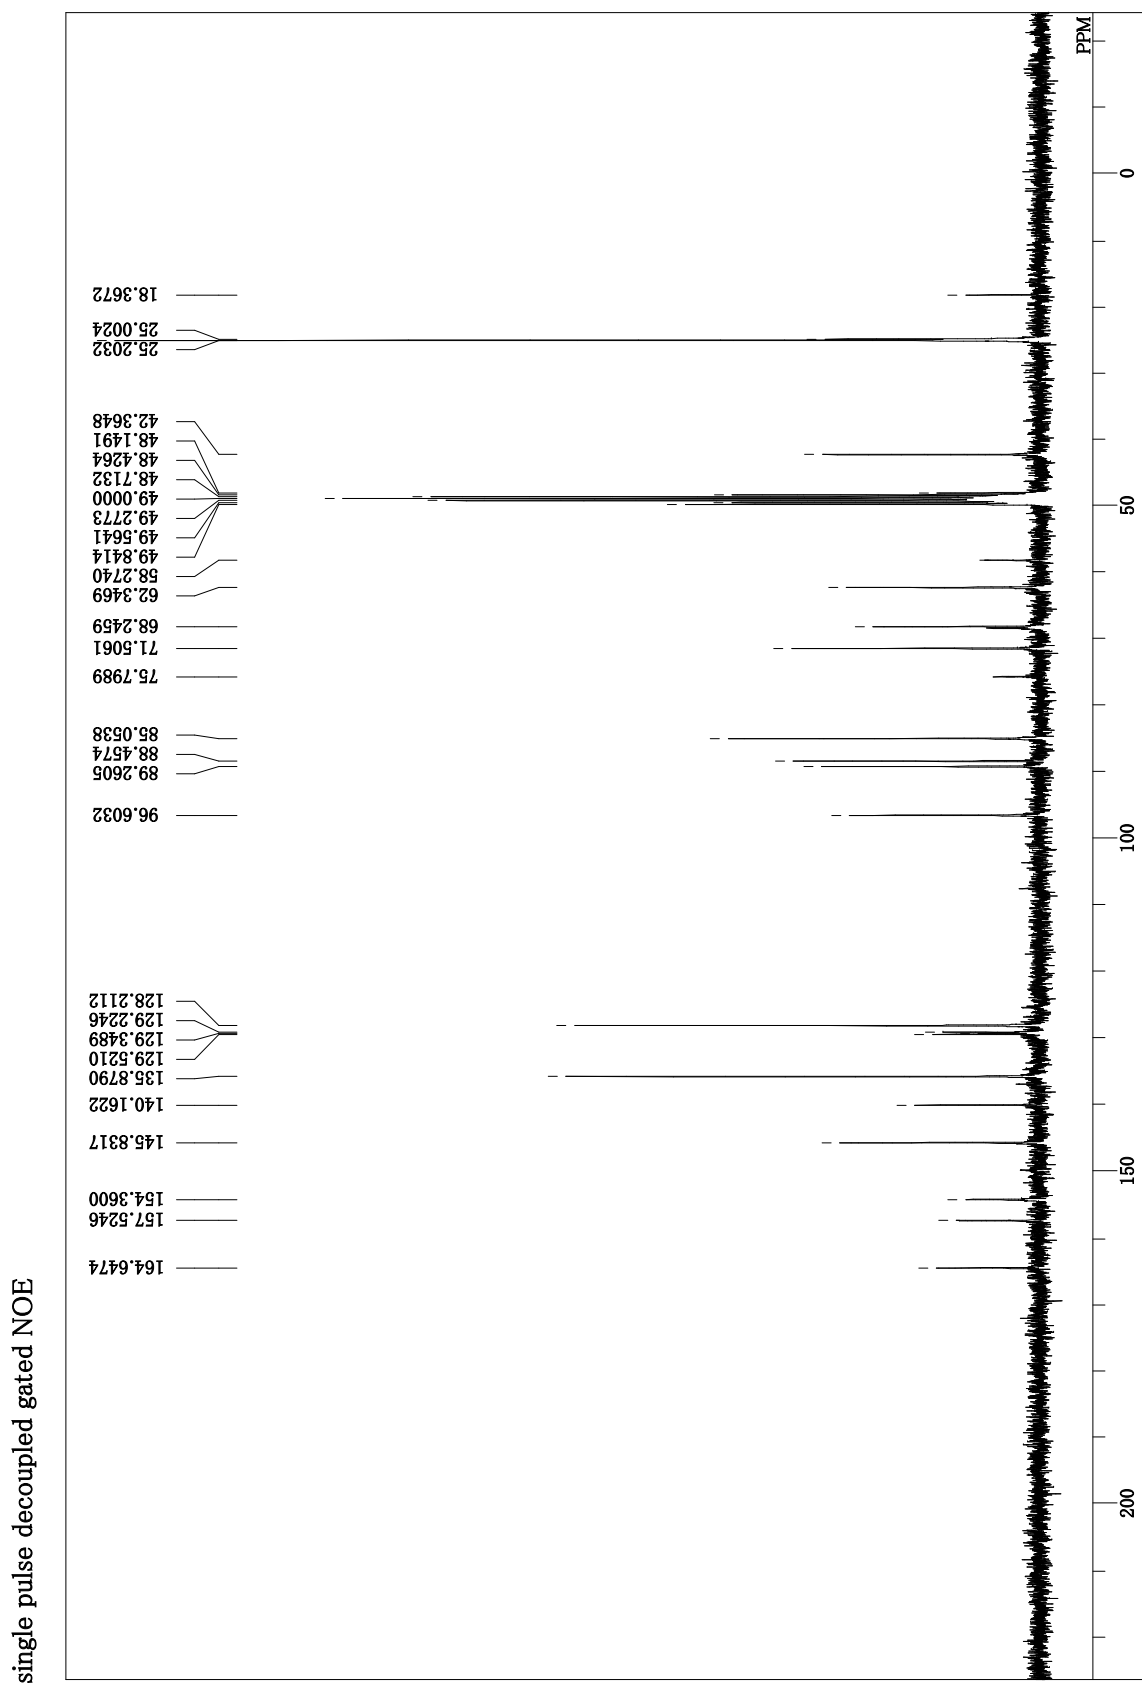

2-17.  $^1\text{H}$  spectrum of compound 21

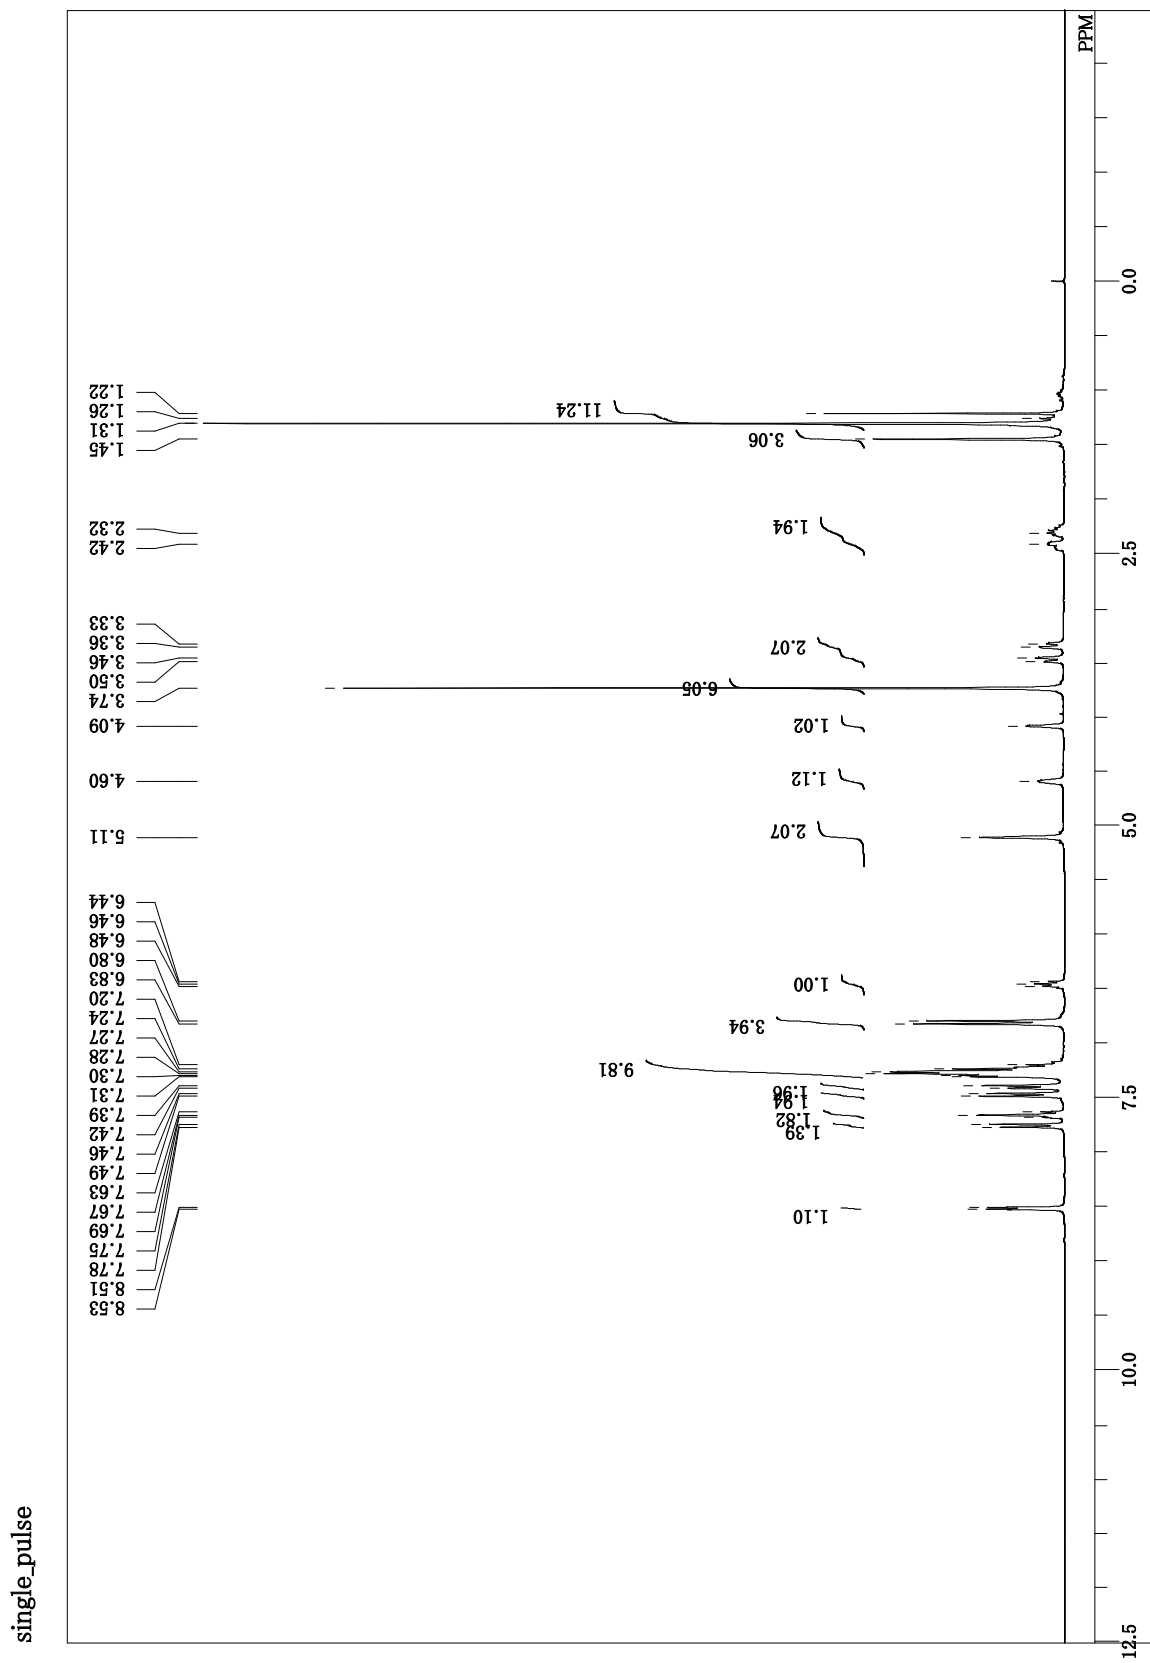

2-18. <sup>13</sup>C spectrum of compound 21

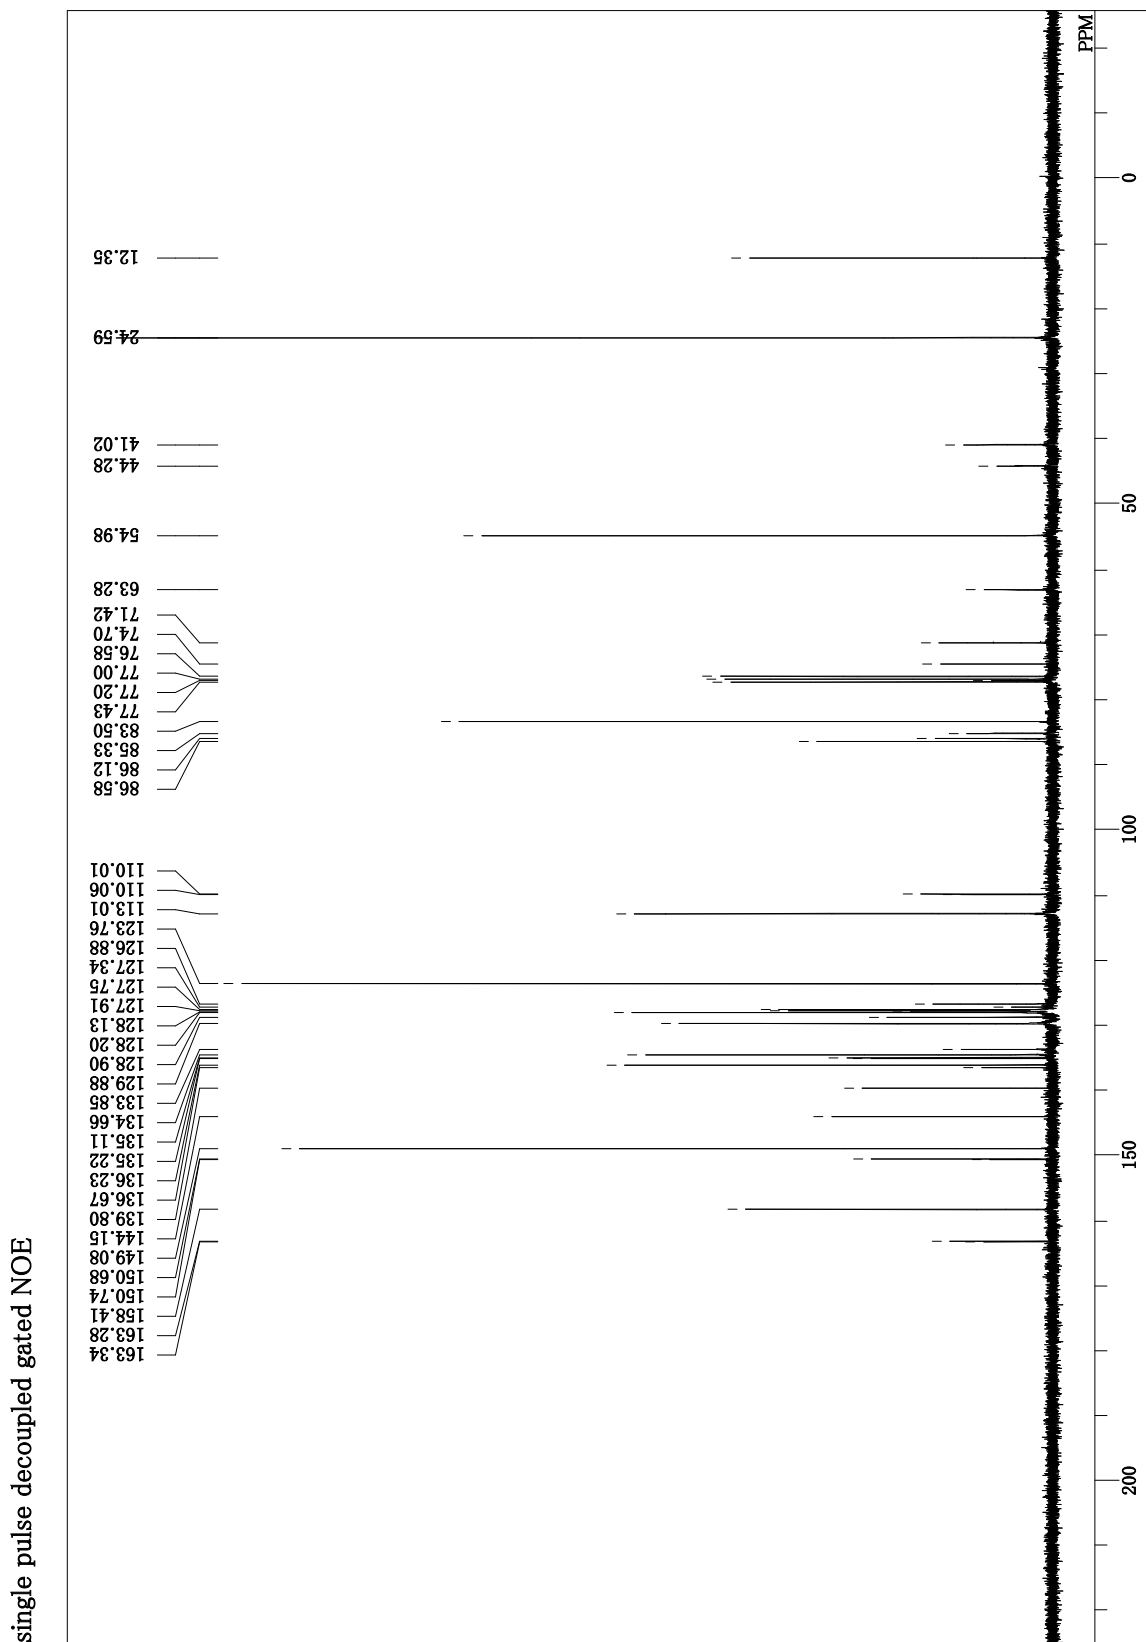



2-20. <sup>13</sup>C spectrum of compound 11

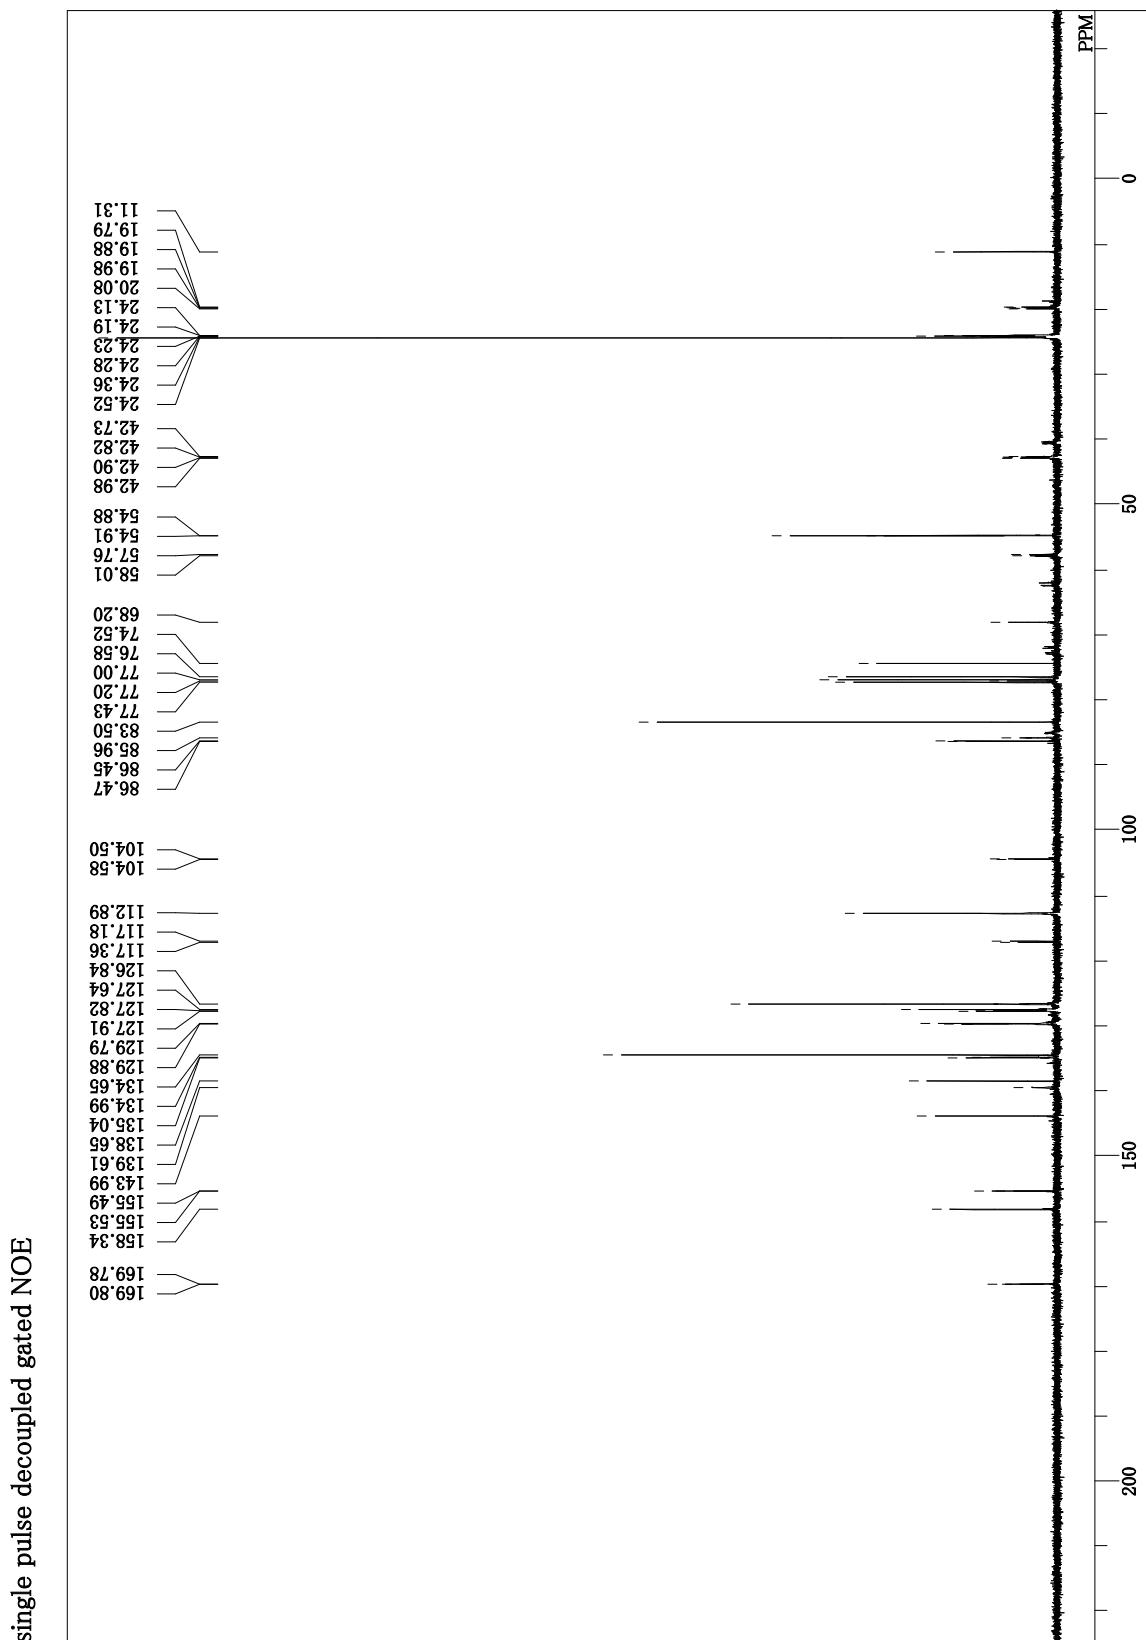

2-21.  $^{31}\text{P}$  spectrum of compound 11

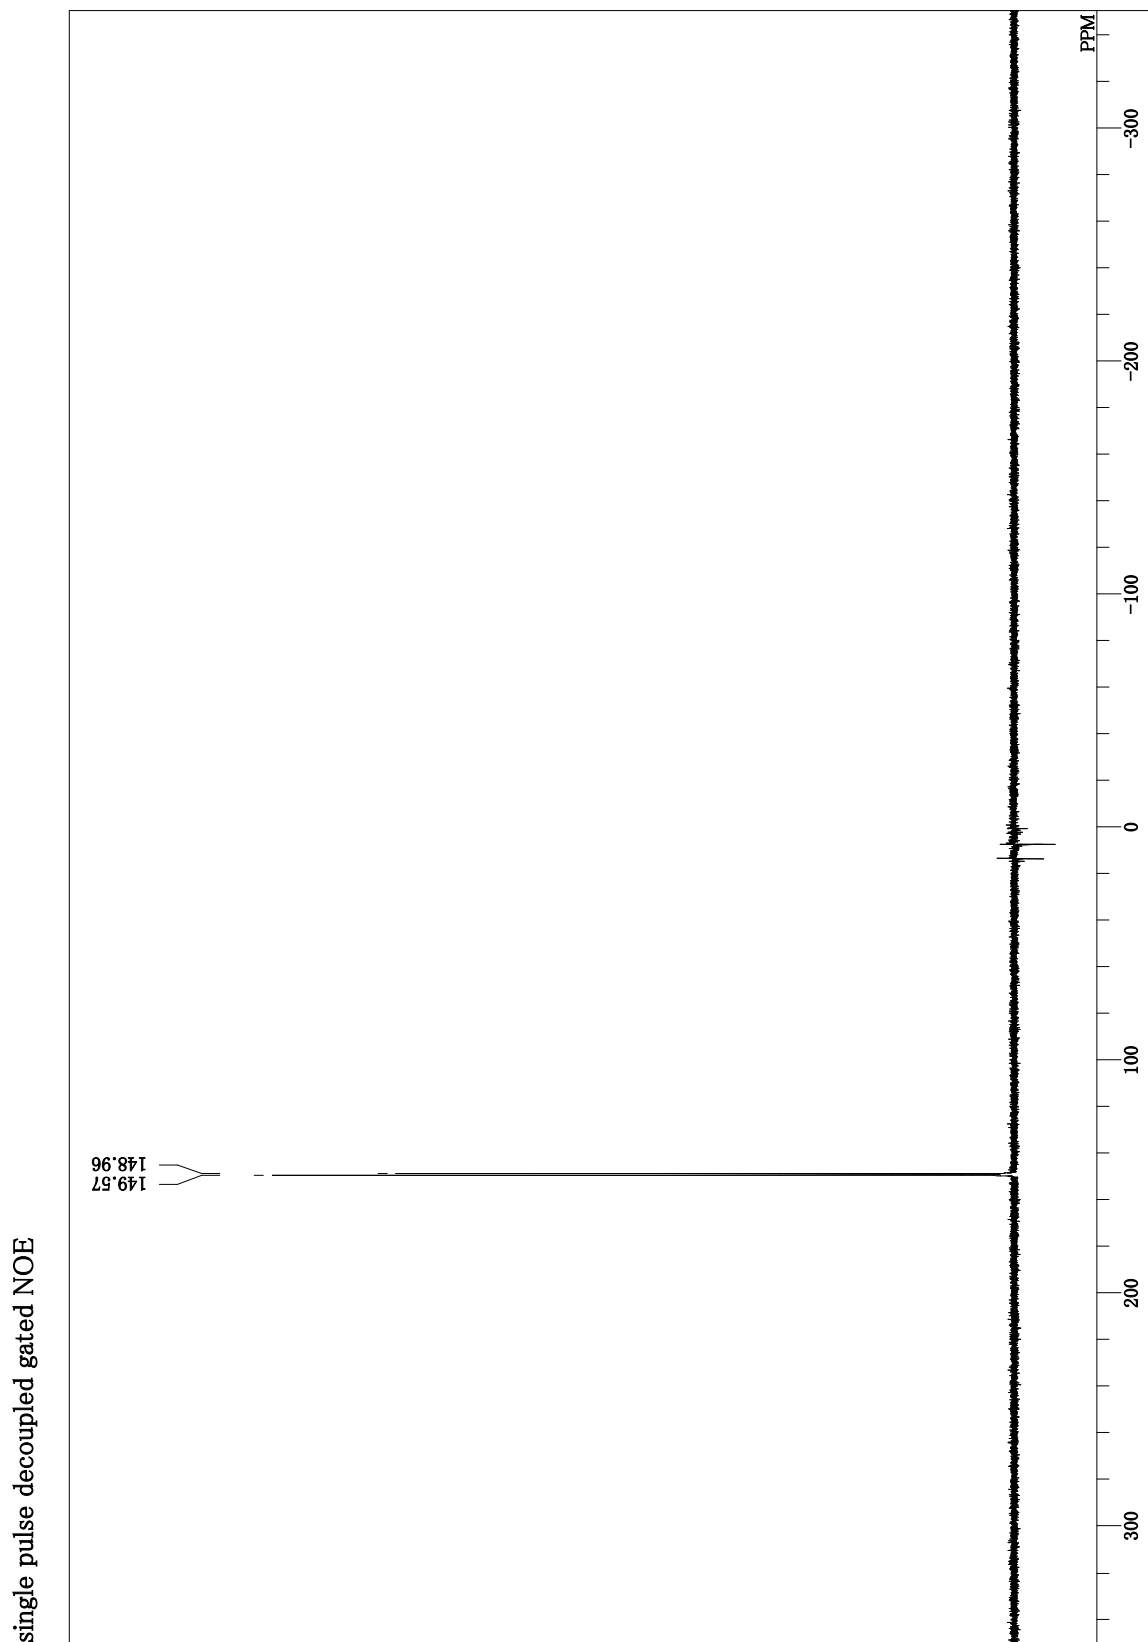

### 3. H<sub>2</sub>O<sub>2</sub>-decaying of boronated nucleosides

3-1. HPLC chromatograms of **dA<sup>Bpin</sup>** after H<sub>2</sub>O<sub>2</sub> addition at different time points.

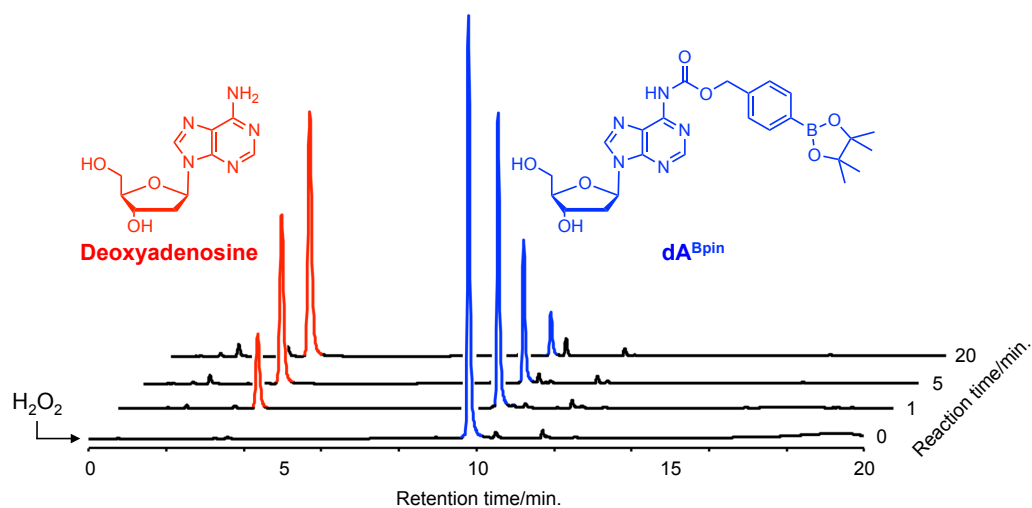

3-2. HPLC chromatograms of **dC<sup>Bpin</sup>** after H<sub>2</sub>O<sub>2</sub> addition at different time points.

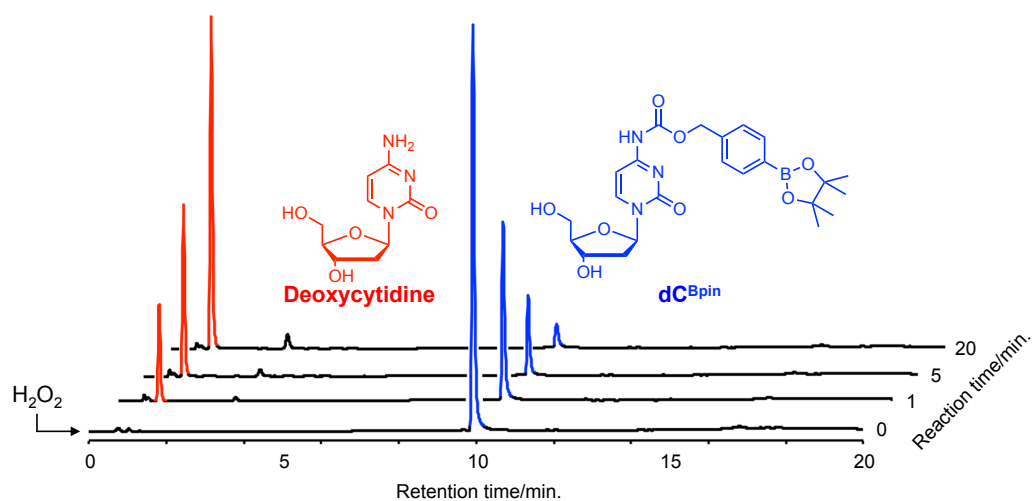

3-3. HPLC chromatograms of **dG<sup>Bpin</sup>** after H<sub>2</sub>O<sub>2</sub> addition at different time points.

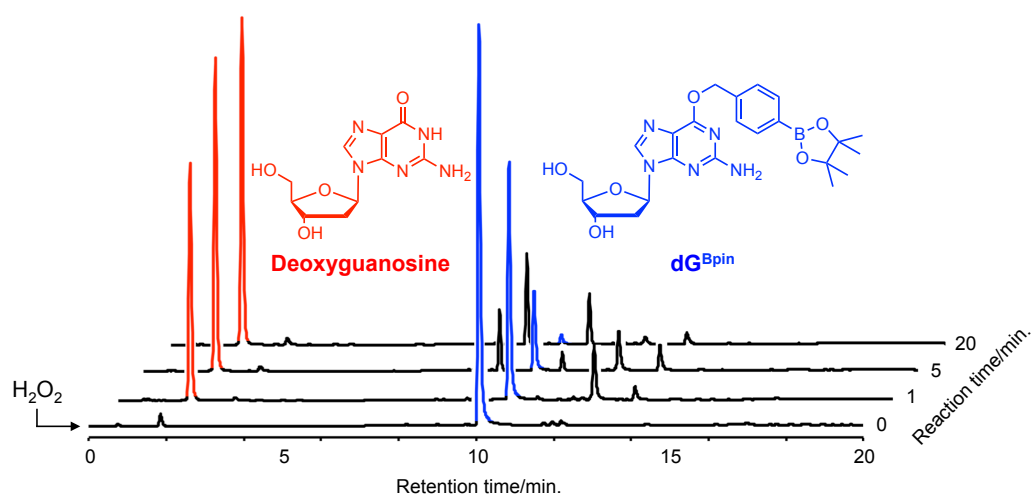

#### 4. Peroxynitrite (ONOO<sup>-</sup>)-decaging of dT<sup>Bpin</sup>

4-1. HPLC chromatograms of dT<sup>Bpin</sup> after peroxynitrite (ONOO<sup>-</sup>) addition at different time points.

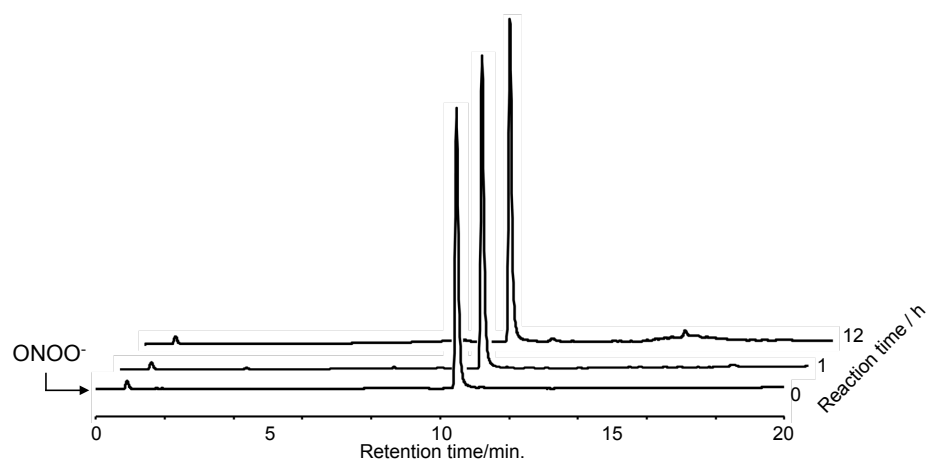



#### 4. ESI and MALDI-TOF MS analysis of dT<sup>B</sup>-modified ODNs

##### 4-1. ON 14 5'-d(GCGTTT<sup>B</sup>TTTCGT)-3'

HPLC

Column: Waters XBridge™ OST C18 2.5 μm, 4.6 x 50 mm

Gradient: 8-16% MeCN (over 30 min) in triethylammonium acetate buffer (pH 7.0, 0.1 M)

Flow rate: 1.0 mL/min

Column temperature: 50 °C

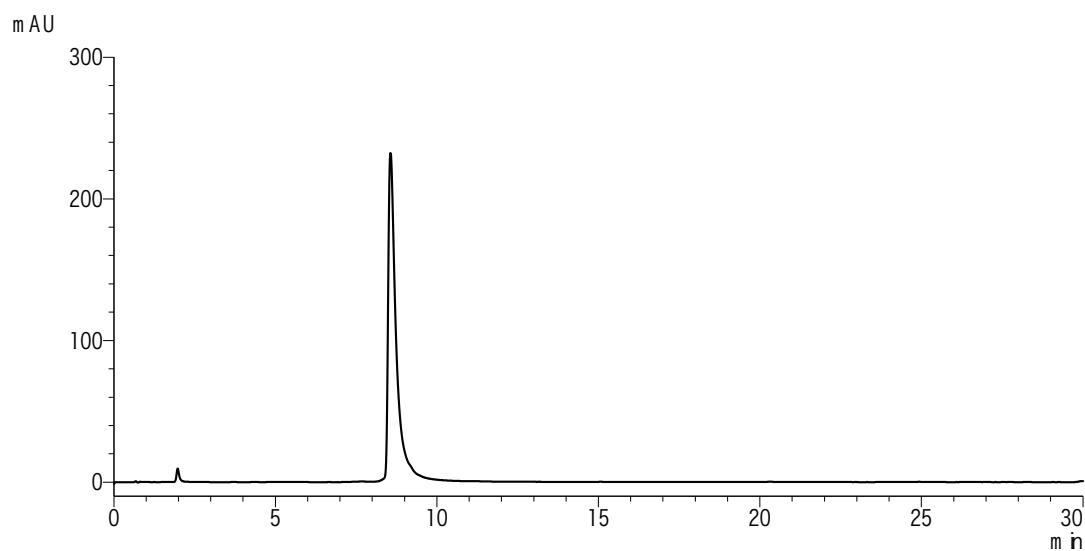

MALDI-TOF MS

Calcd. 3766.30 [M-H]<sup>-</sup> / citric acid adduct 3922.39 [M-H]<sup>-</sup>

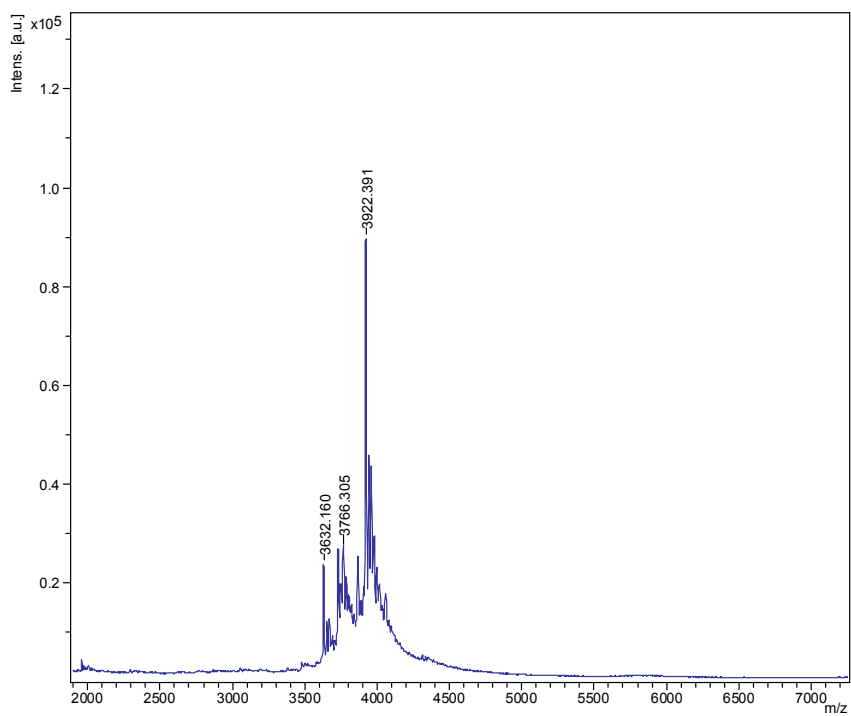

S33

ESI MS

Calcd. 3731.30 [M - 2 x H<sub>2</sub>O]

TOF MS ES-  
3.38e6

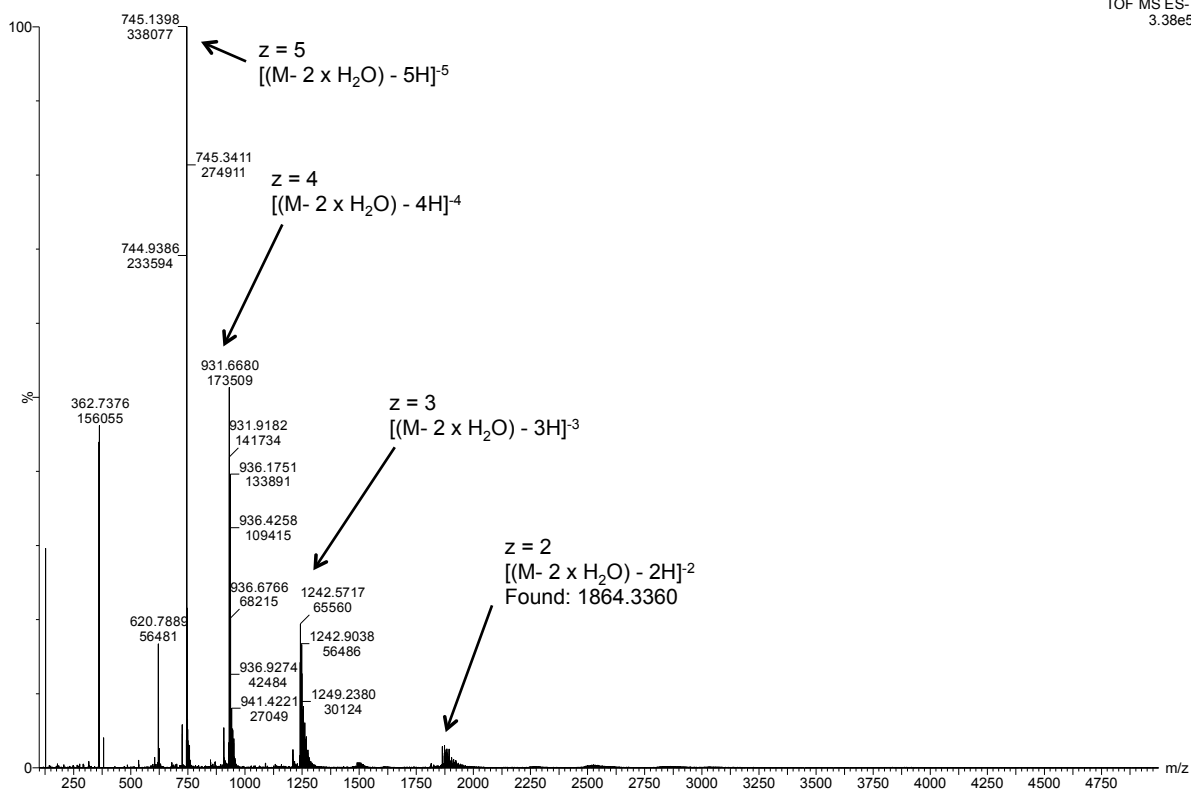

#### 4-2. ON 14 5'-d(GCGTTT<sup>B</sup>TTTCGT)-3' + H<sub>2</sub>O<sub>2</sub>

**ON 14** was dissolved in 10 mM sodium phosphate buffer (pH 7.2) containing 100 mM NaCl to give a final strand concentration of 4.0 μM. To the **ON 14** solutions was added H<sub>2</sub>O<sub>2</sub> (1 mM) and the resulting sample mixture was incubated for 30 min at room temperature in advance to the HPLC analysis and mass measurement.

#### HPLC

Column: Waters XBridge™ OST C18 2.5 μm, 4.6 x 50 mm

Gradient: 8-16% MeCN (over 30 min) in triethylammonium acetate buffer (pH 7.0, 0.1 M)

Flow rate: 1.0 mL/min

Column temperature: 50 °C

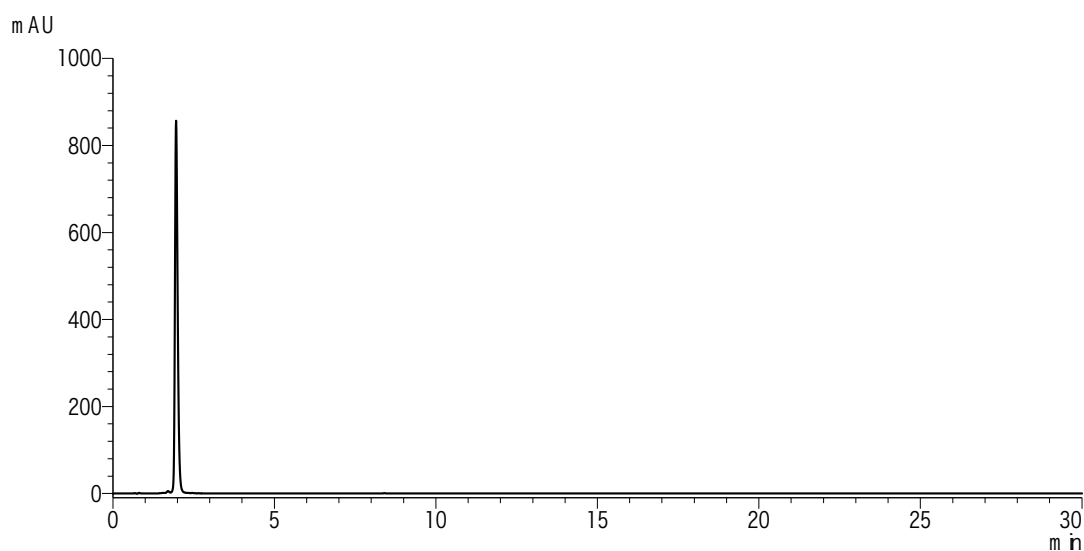

#### MALDI-TOF MS

Calcd. 3632.37 [M-H]<sup>-</sup>

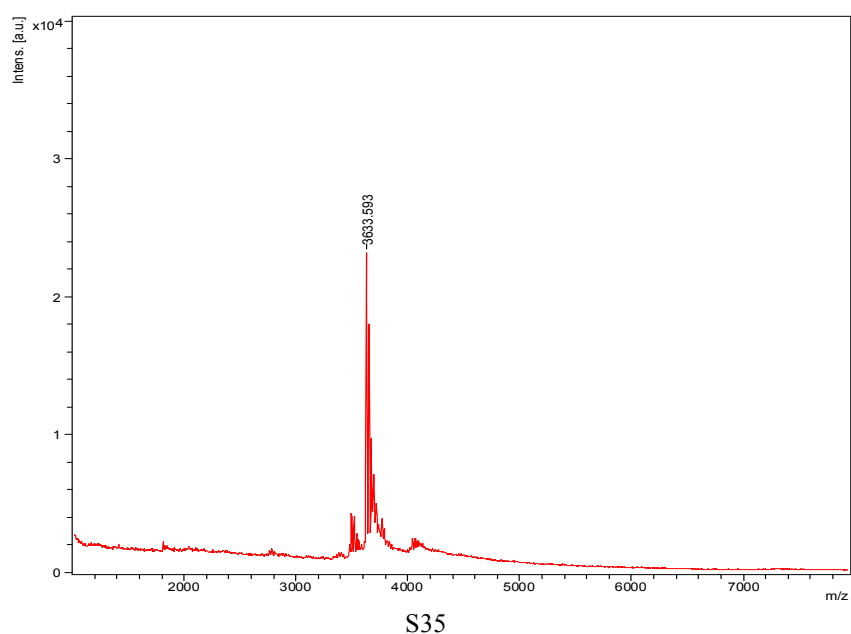

### 4-3. ASO S<sub>0</sub> 5'-TC<sup>m</sup>agtcatgactTC<sup>m</sup>-3'

n = DNA N = LNA, all internucleosidic linkages are phosphorothioated

HPLC

Column: Waters XBridge™ OST C18 2.5 μm, 4.6 x 50 mm

Gradient: 10-40% MeCN (over 30 min) in triethylammonium acetate buffer (pH 7.0, 0.1 M)

Flow rate: 1.0 mL/min

Column temperature: 80 °C

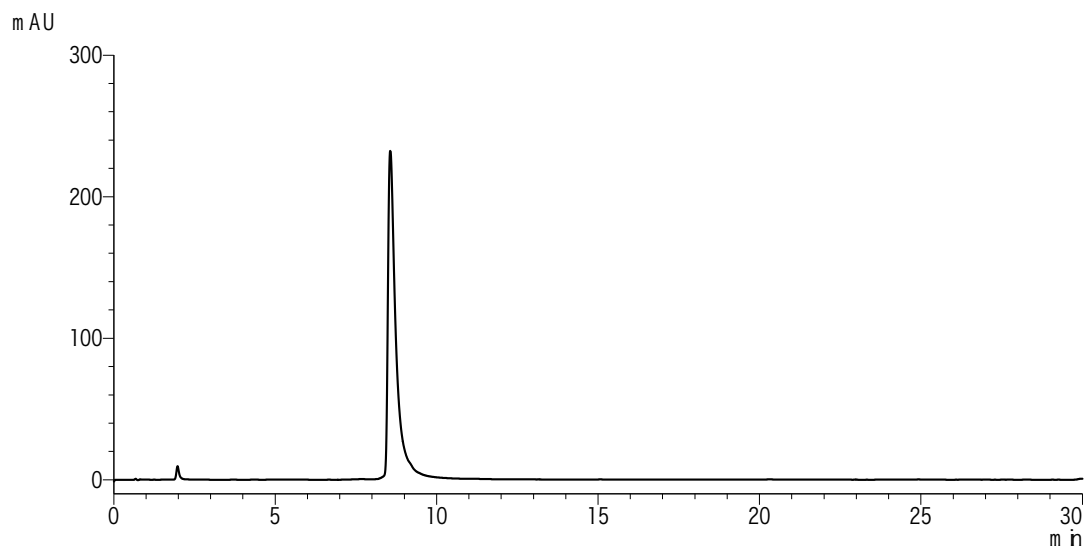

MALDI-TOF MS

Calcd. 4561.71 [M-H]<sup>-</sup>

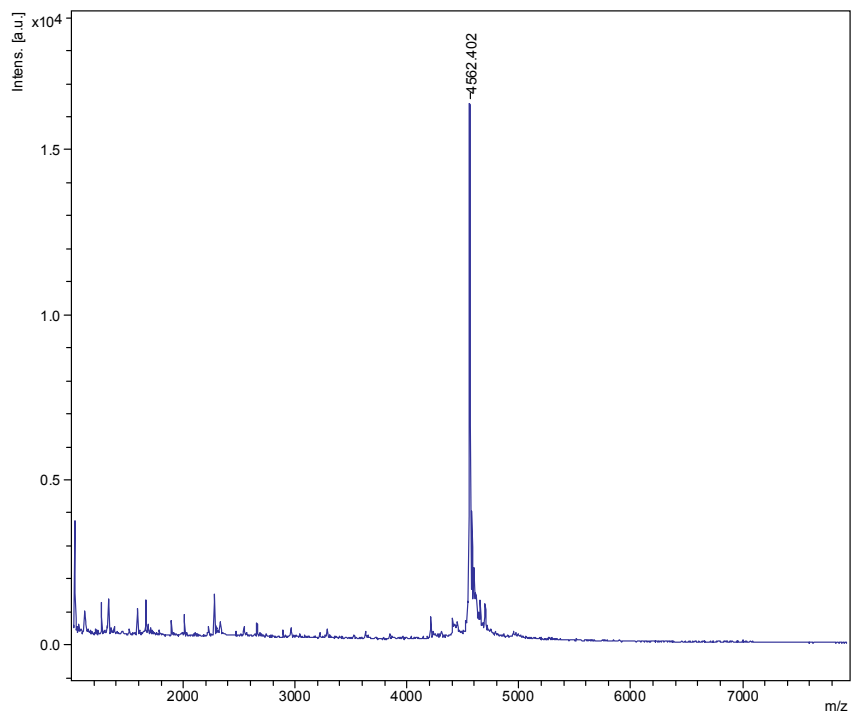



#### 4-4. ASO S<sub>1</sub> 5'-TC<sup>m</sup>agt<sup>B</sup>catgactTC<sup>m</sup>-3'

n = DNA N = LNA, all internucleosidic linkages are phosphorothioated

HPLC

Column: Waters XBridge<sup>TM</sup> OST C18 2.5 μm, 4.6 x 50 mm

Gradient: 10-40% MeCN (over 30 min) in triethylammonium acetate buffer (pH 7.0, 0.1 M)

Flow rate: 1.0 mL/min

Column temperature: 80 °C

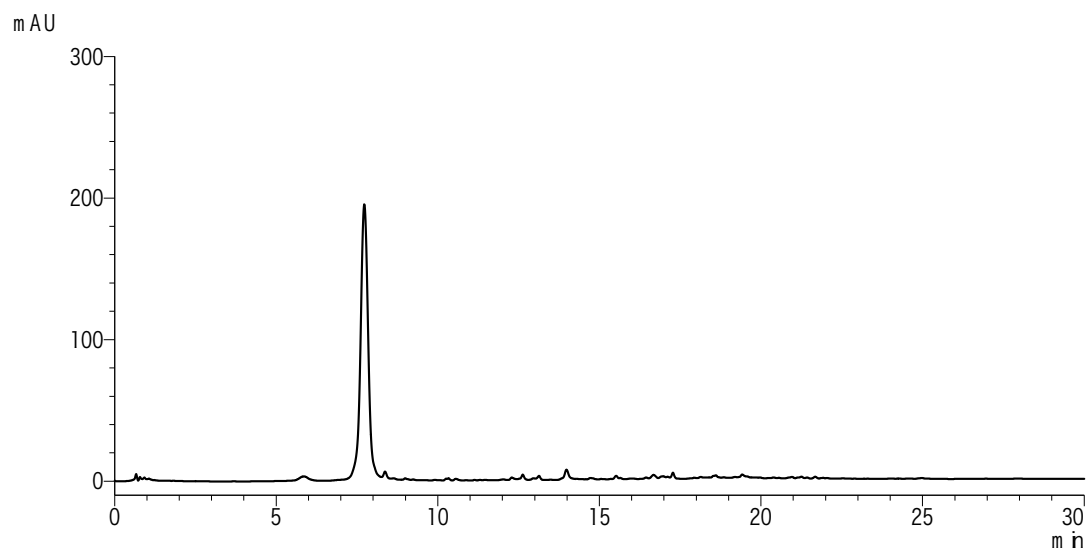

ESI MS

Calcd. 4660.62 [M - 2 x H<sub>2</sub>O]

TOF MS ES-  
1.86e4

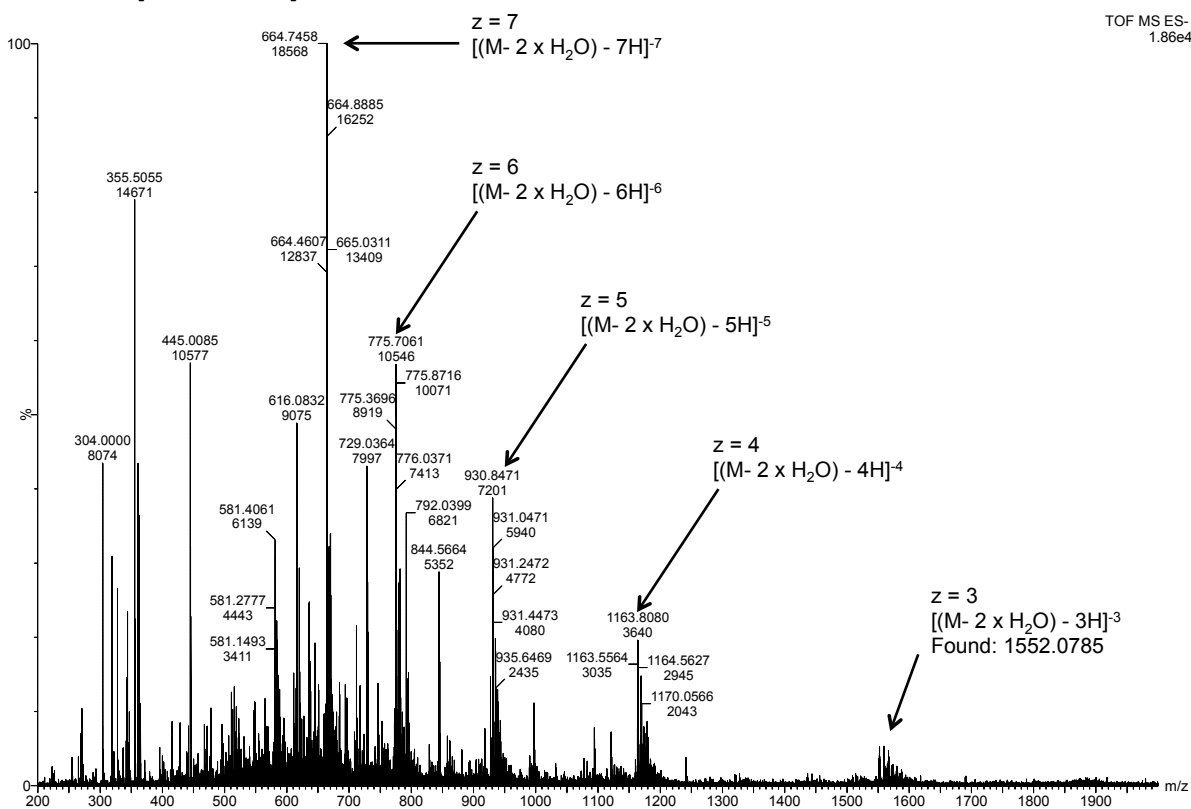

#### 4-5. ASO S<sub>2</sub> 5'-TC<sup>m</sup>agt<sup>B</sup>cat<sup>B</sup>gactTC<sup>m</sup>-3'

n = DNA N = LNA, all internucleosidic linkages are phosphorothioated

HPLC

Column: Waters XBridge<sup>TM</sup> OST C18 2.5 μm, 4.6 x 50 mm

Gradient: 10-40% MeCN (over 30 min) in triethylammonium acetate buffer (pH 7.0, 0.1 M)

Flow rate: 1.0 mL/min

Column temperature: 80 °C

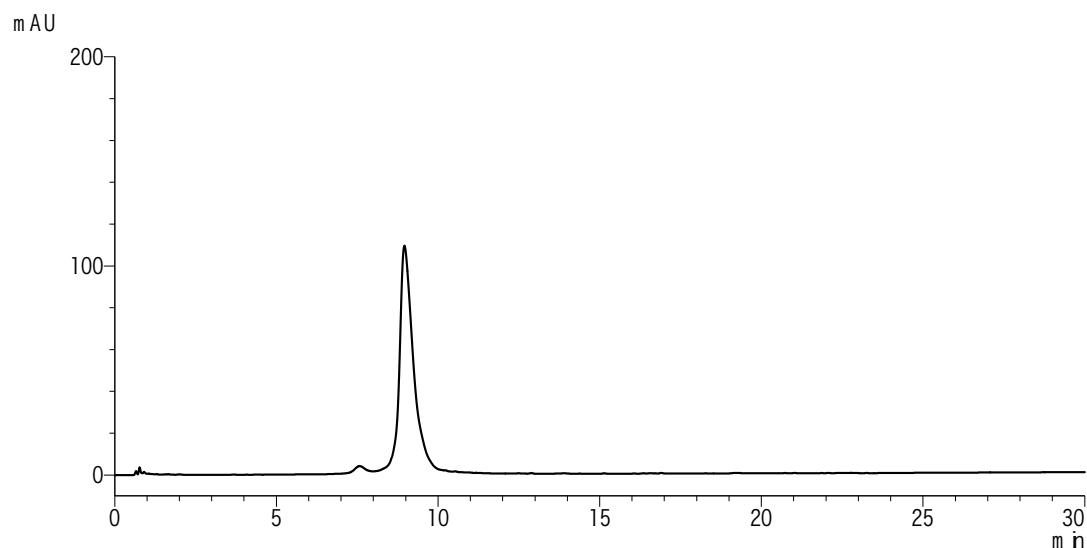

ESI MS

Calcd. 4758.52 [M - 4 x H<sub>2</sub>O]

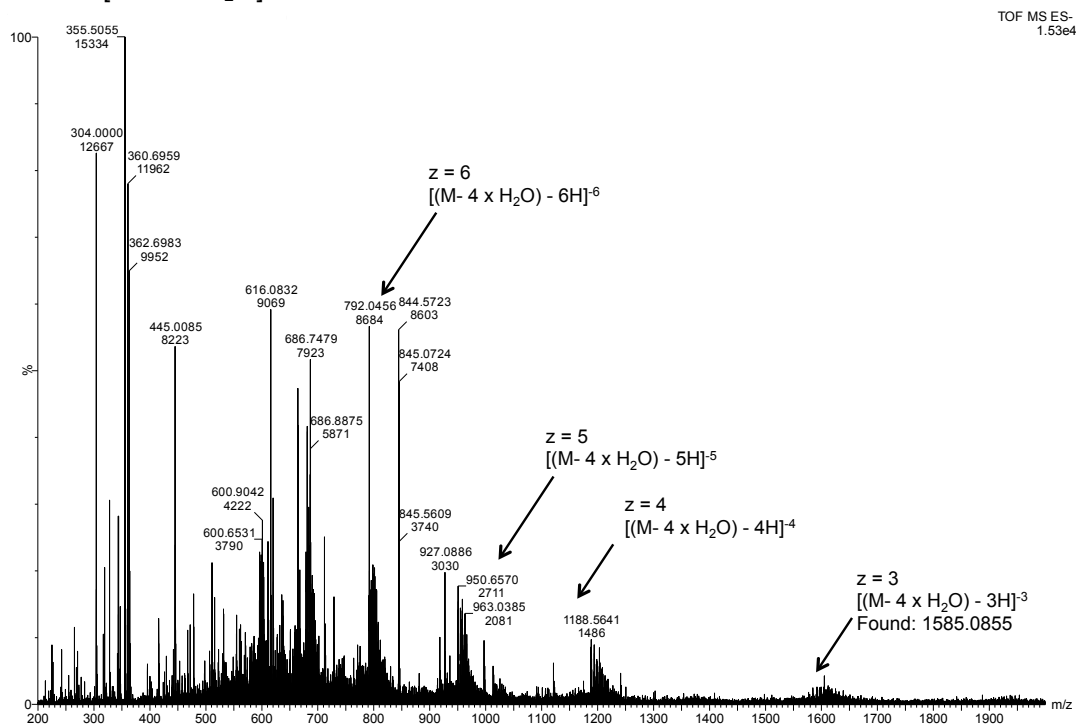

#### 4-6. ASO S<sub>3</sub> 5'-TC<sup>m</sup>agt<sup>B</sup>cat<sup>B</sup>gact<sup>B</sup>TC<sup>m</sup>-3'

n = DNA N = LNA, all internucleosidic linkages are phosphorothioated

HPLC

Column: Waters XBridge™ OST C18 2.5 μm, 4.6 x 50 mm

Gradient: 10-40% MeCN (over 30 min) in triethylammonium acetate buffer (pH 7.0, 0.1 M)

Flow rate: 1.0 mL/min

Column temperature: 80 °C

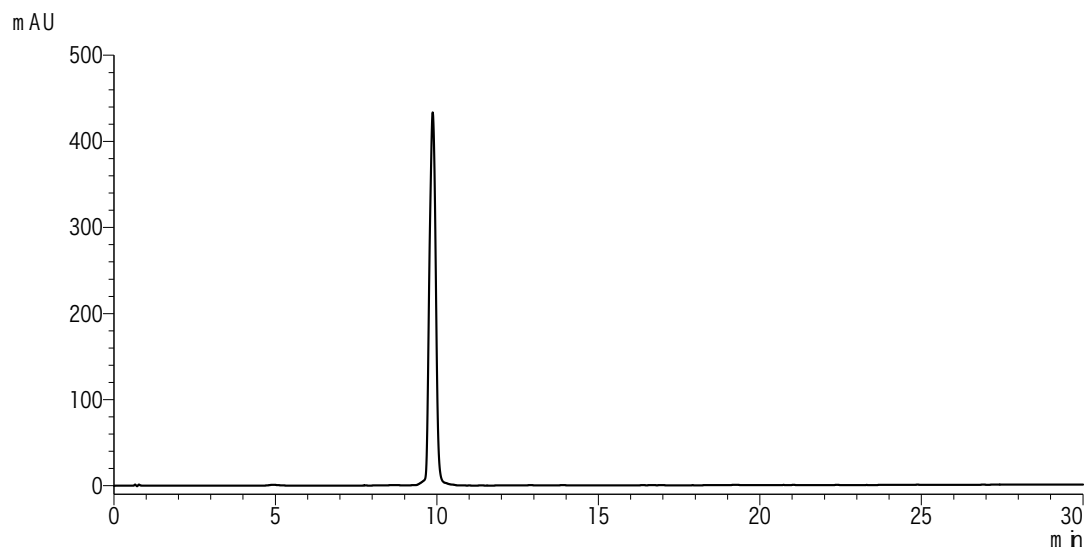

ESI MS

Calcd. 4892.45 [M - 4 x H<sub>2</sub>O]

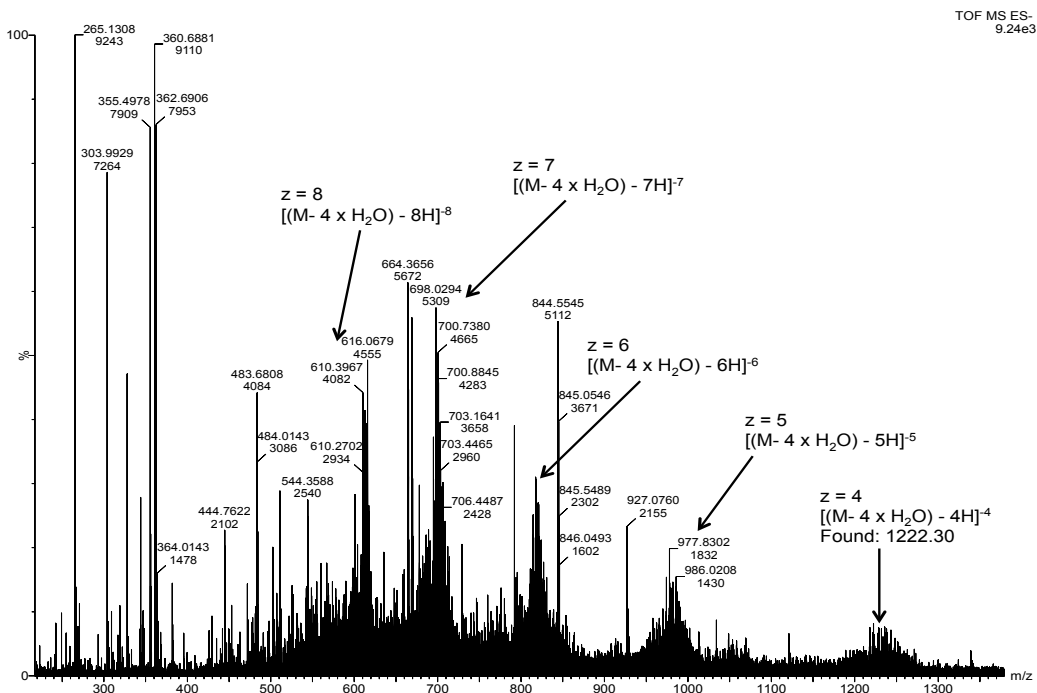



#### 4-7. ASO S<sub>A</sub> 5'-GC<sup>m</sup>attggtatTC<sup>m</sup>A-3'

n = DNA N = LNA, all internucleosidic linkages are phosphorothioated

HPLC

Column: Waters XBridge™ OST C18 2.5 μm, 4.6 x 50 mm

Gradient: 10-40% MeCN (over 30 min) in triethylammonium acetate buffer (pH 7.0, 0.1 M)

Flow rate: 1.0 mL/min

Column temperature: 80 °C

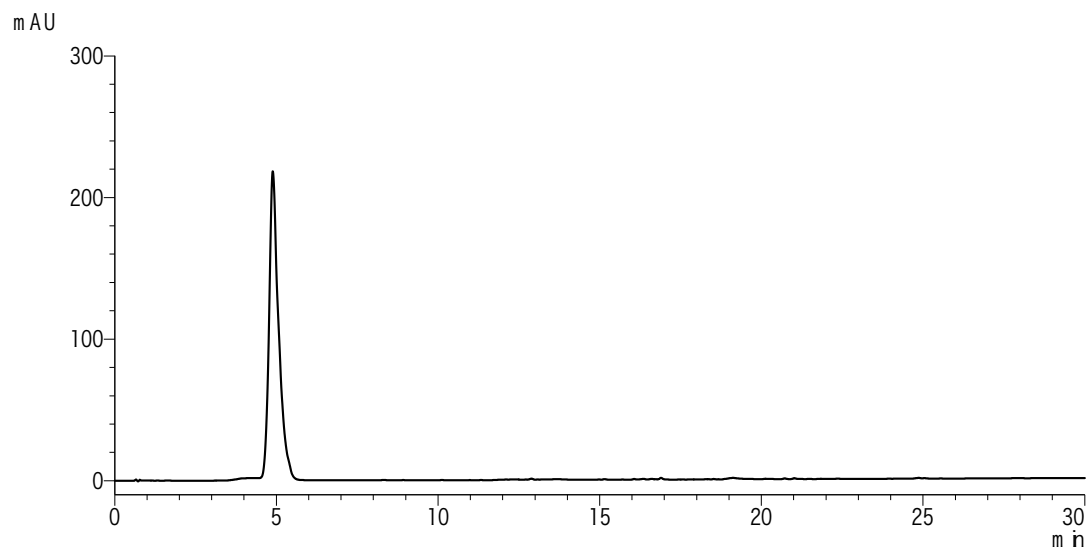

MALDI-TOF MS

Calcd. 4324.49 [M-H]<sup>-</sup>

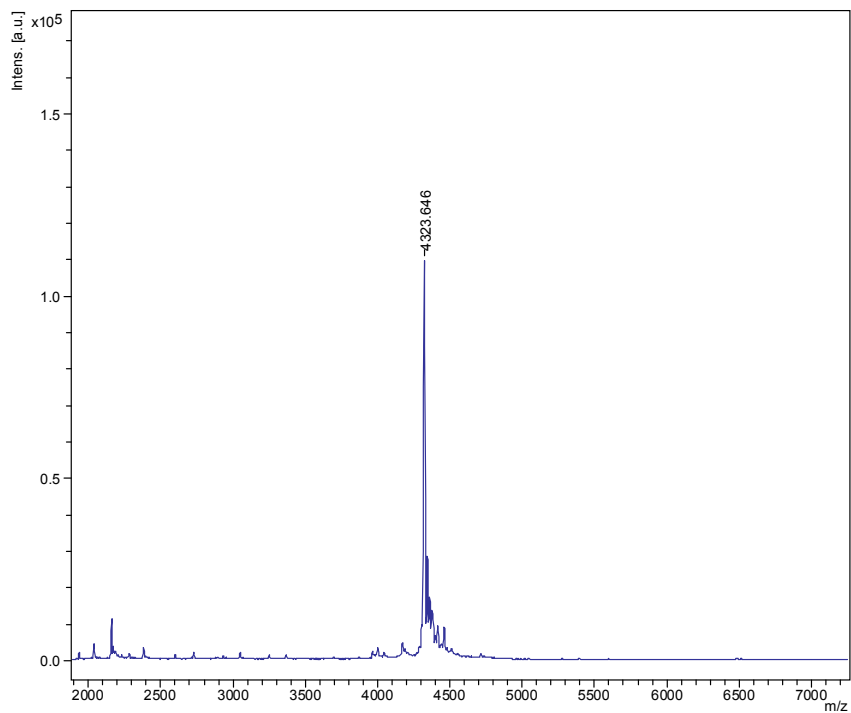

S41

ESI MS

Calcd. 4325.49 [M]

TOF MS ES-  
2.04e4

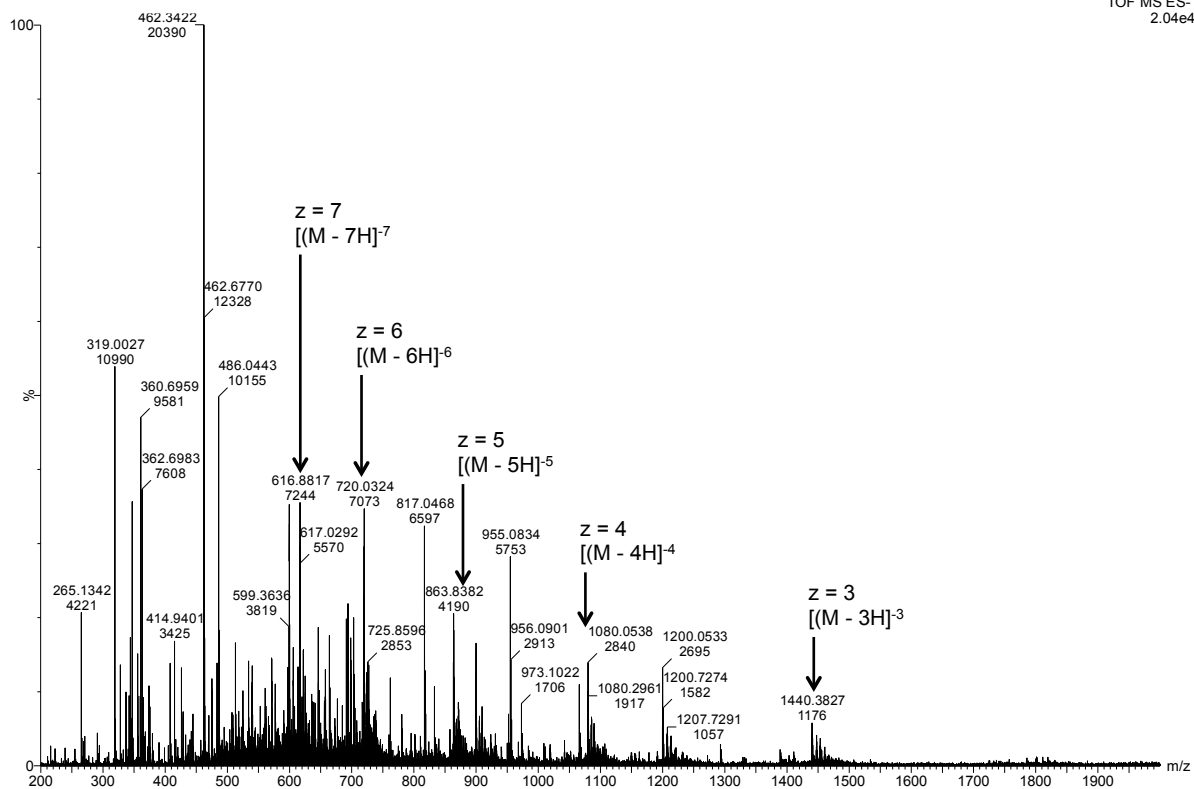

## 5. UV melting experiments of duplexes containing dT<sup>B</sup> without or with H<sub>2</sub>O<sub>2</sub>

Equimolecular amounts of the target DNA/RNA and oligonucleotides were dissolved in 10 mM sodium phosphate buffer (pH 7.2) containing 100 mM NaCl to give a final strand concentration of 4.0 μM. Under the H<sub>2</sub>O<sub>2</sub> presence condition, to the duplex solution was added H<sub>2</sub>O<sub>2</sub> (1 mM) and the resulting sample mixture was incubated for 30 min at room temperature in advance to the UV melting experiments.

**Table S1.** Melting temperature of duplex between ODN14 and RNA target in the presence or absence of H<sub>2</sub>O<sub>2</sub>.

| ODN 5'-d(GCGTTXTTTCGT)-3' |                                                                                   | cRNA 3'-r(CGCAAYAAAGCA)-5' |    |    |    |
|---------------------------|-----------------------------------------------------------------------------------|----------------------------|----|----|----|
| ODN                       | X                                                                                 | Y                          |    |    |    |
|                           |                                                                                   | A                          | G  | C  | U  |
| <i>T<sub>m</sub></i> / °C |                                                                                   |                            |    |    |    |
| 14                        | 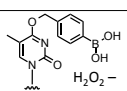 | 32                         | 39 | 30 | 31 |
| 14                        |  | 46                         | 39 | 30 | 32 |
| 15                        |  | 47                         | 37 | 29 | 30 |

**Table S2.** Melting temperature of duplex between ODN14 and DNA target in the presence or absence of H<sub>2</sub>O<sub>2</sub>.

| ODN 5'-d(GCGTTXTTTCGT)-3' |                                                                                    | cDNA 3'-d(CGCAAYAAAGCA)-5' |    |    |    |
|---------------------------|------------------------------------------------------------------------------------|----------------------------|----|----|----|
| ODN                       | X                                                                                  | Y                          |    |    |    |
|                           |                                                                                    | A                          | G  | C  | U  |
| <i>T<sub>m</sub></i> / °C |                                                                                    |                            |    |    |    |
| 14                        | 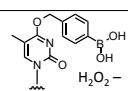 | 31                         | 35 | 33 | 34 |
| 14                        |  | 52                         | 41 | 36 | 38 |
| 15                        |  | 52                         | 41 | 37 | 40 |

## 6. Reference

S1 C. Chung, D. Srikun, C. S. Lim, C. J. Chang and B. R.Cho, *Chem. Commun.*, 2011, **47**, 9618–9620.
